# Supplementary material
Source: publisher figshare collection journal article supplement (https://plos.figshare.com/articles/dataset/_/7853096)
Supplement: Supplementary file 1 [file 1]

Archive with 40 entries (40 files):
- pgen.1008055.s001.pdf
- pgen.1008055.s002.pdf
- pgen.1008055.s003.pdf
- pgen.1008055.s004.pdf
- pgen.1008055.s005.pdf
- pgen.1008055.s006.pdf
- pgen.1008055.s007.pdf
- pgen.1008055.s008.pdf
- pgen.1008055.s009.pdf
- pgen.1008055.s010.pdf
- pgen.1008055.s011.pdf
- pgen.1008055.s012.pdf
- pgen.1008055.s013.pdf
- pgen.1008055.s014.pdf
- pgen.1008055.s015.pdf
- pgen.1008055.s016.pdf
- pgen.1008055.s017.pdf
- pgen.1008055.s018.pdf
- pgen.1008055.s019.pdf
- pgen.1008055.s020.pdf
- pgen.1008055.s021.pdf
- pgen.1008055.s022.pdf
- pgen.1008055.s023.pdf
- pgen.1008055.s024.pdf
- pgen.1008055.s025.xlsx
- pgen.1008055.s026.pdf
- pgen.1008055.s027.pdf
- pgen.1008055.s028.xlsx
- pgen.1008055.s029.xlsx
- pgen.1008055.s030.xlsx
- pgen.1008055.s031.pdf
- pgen.1008055.s032.pdf
- pgen.1008055.s033.pdf
- pgen.1008055.s034.pdf
- pgen.1008055.s035.pdf
- pgen.1008055.s036.pdf
- pgen.1008055.s037.xlsx
- pgen.1008055.s038.pdf
- pgen.1008055.s039.pdf
- pgen.1008055.s040.xlsx
