# Supplementary material
Source: publisher figshare collection journal article supplement (https://plos.figshare.com/articles/dataset/_/7853096)
Supplement: Supplementary file 1 [file 1 › pgen.1008055.s001.pdf]

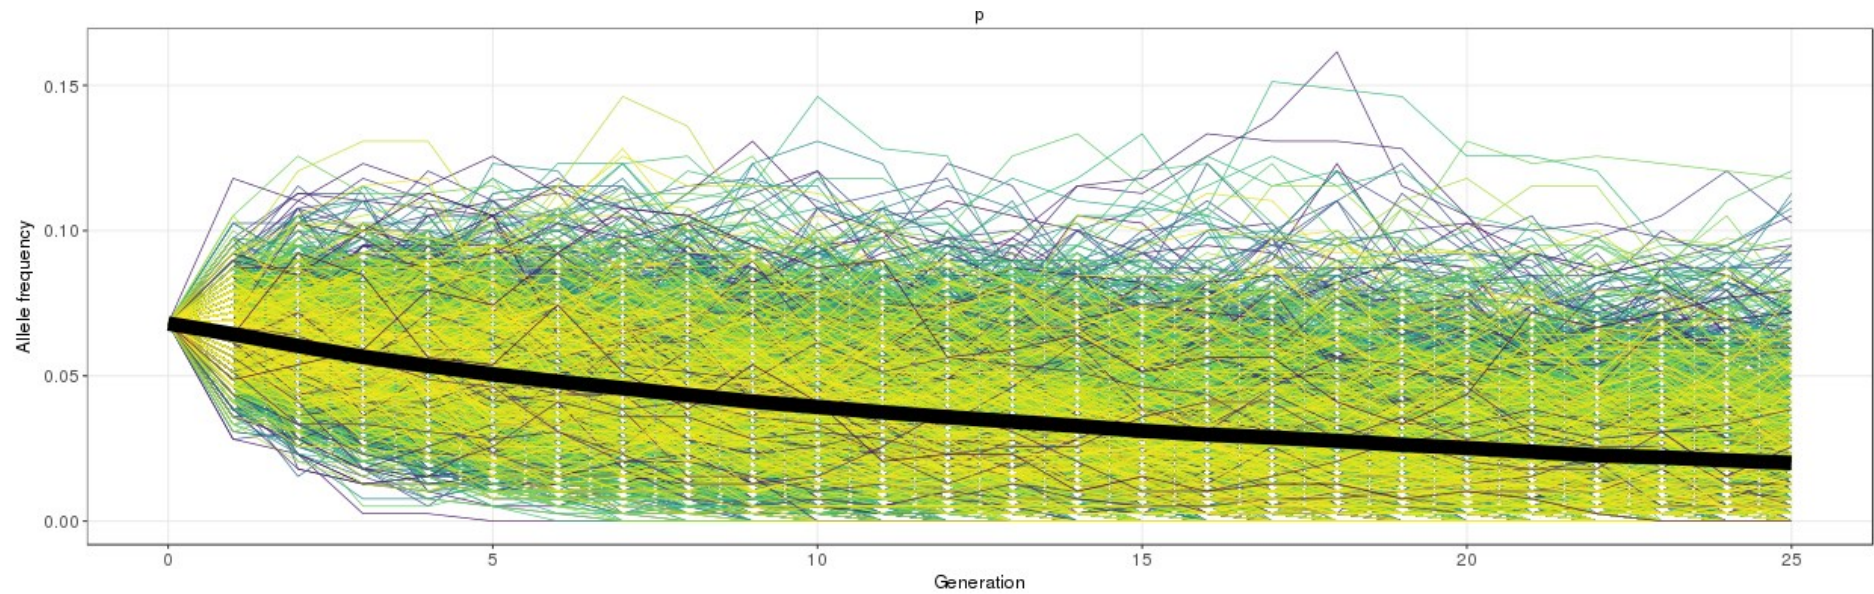

**Figure S1: Genetic drift simulation for a lethal recessive with an allele frequency of 6.7% (13.4% carrier frequency) over 25 generations.** Plot shows frequency after 25 generations for 1000 simulations. The allele is lost in approximately 30% of the simulations. In 7.5% of the simulations the frequency after 25 generations is equal or greater than the start frequency.
