# Supplementary material
Source: publisher figshare collection journal article supplement (https://plos.figshare.com/articles/dataset/_/7853096)
Supplement: Supplementary file 1 [file 1 › pgen.1008055.s002.pdf]

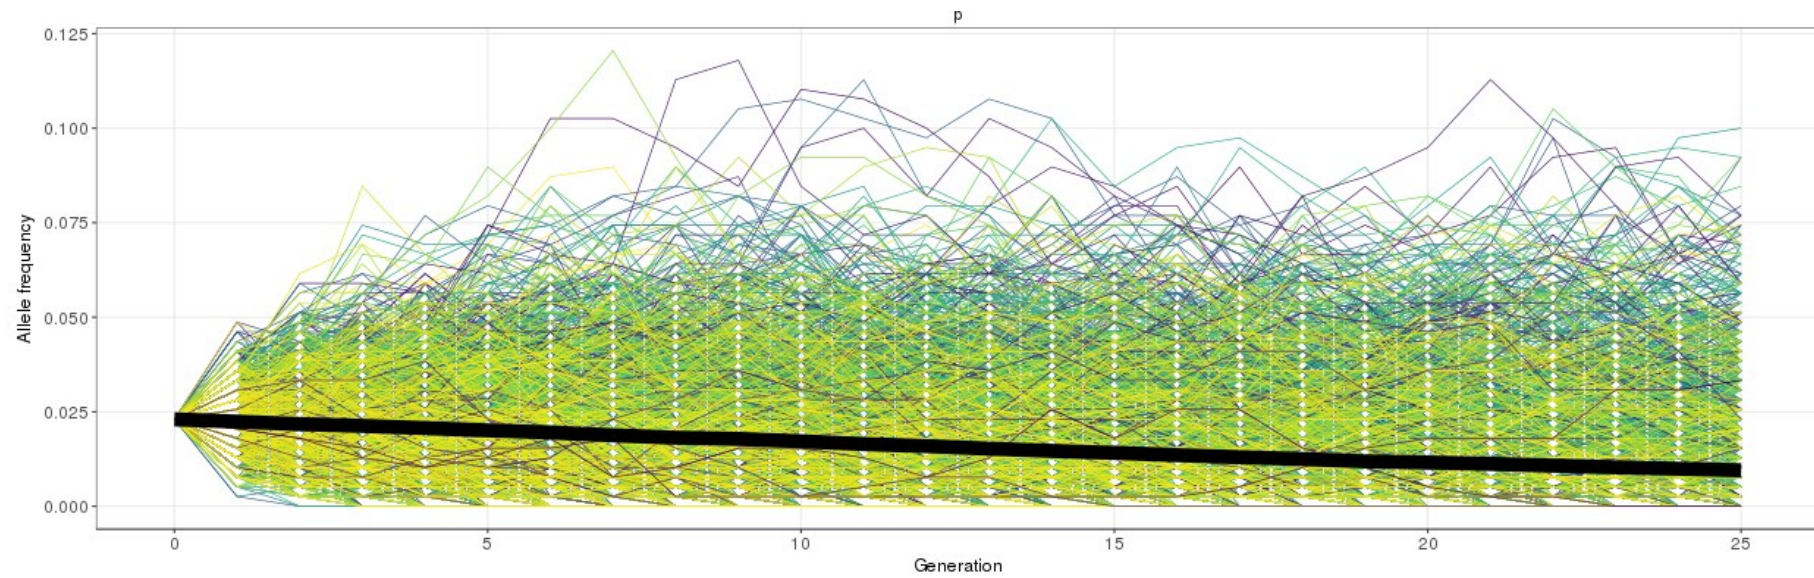

**Figure S2: Genetic drift simulation for a lethal allele with 2.3% allele frequency (carrier frequency: 4.6%) over 25 generations.** Plot shows frequency after 25 generations for 1000 simulations. The allele is lost in approximately 62% of the simulations, while in 25% of the simulations the frequency after 25 generations is equal or greater than the start frequency.
