# Supplementary material
Source: publisher figshare collection journal article supplement (https://plos.figshare.com/articles/dataset/_/7853096)
Supplement: Supplementary file 1 [file 1 › pgen.1008055.s003.pdf]

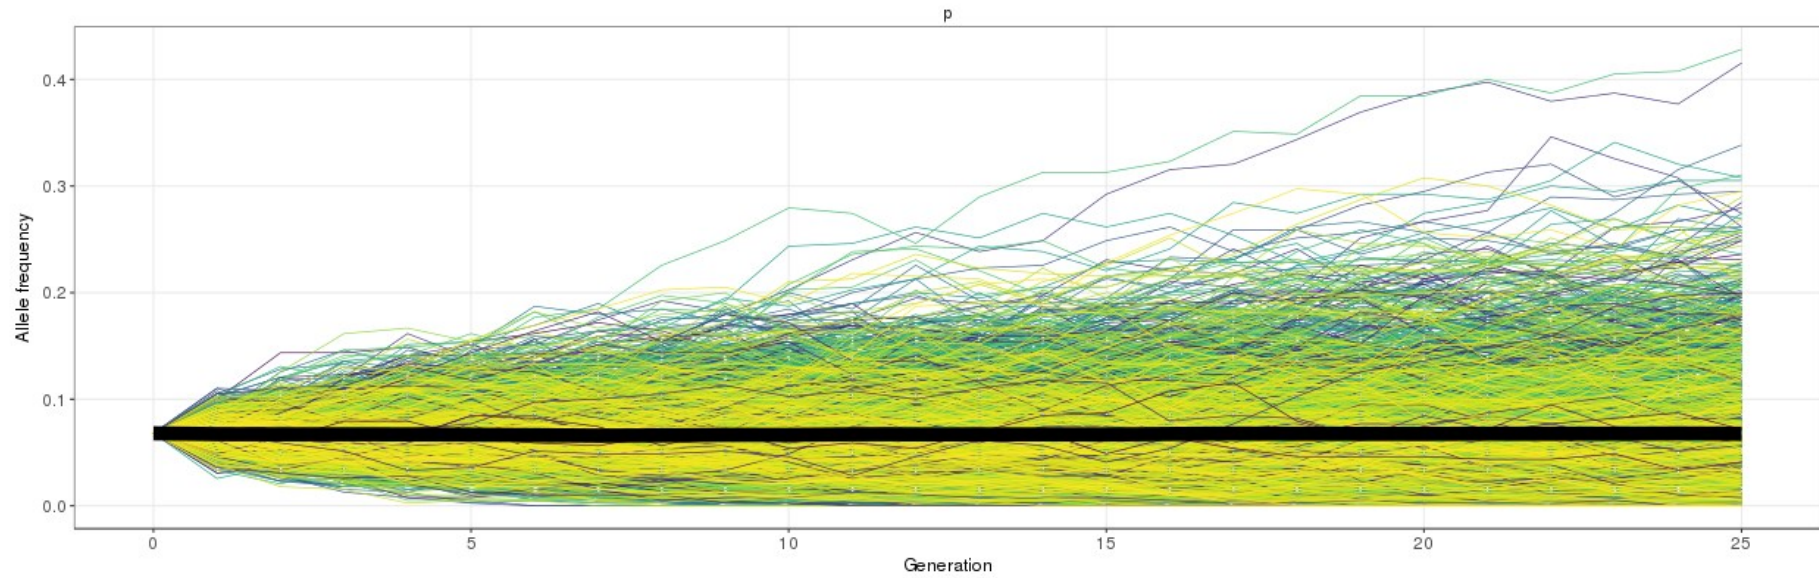

**Figure S3: Genetic drift simulation for a neutral allele with 6.7% allele frequency (13.4% carrier frequency) over 25 generations.** Plot shows frequency after 25 generations for 1000 simulations. The allele is lost in approximately 14% of the simulations, while in 49% of the simulations the frequency after 25 generations is equal or greater than the start frequency.
