# Supplementary material
Source: publisher figshare collection journal article supplement (https://plos.figshare.com/articles/dataset/_/7853096)
Supplement: Supplementary file 1 [file 1 › pgen.1008055.s004.pdf]

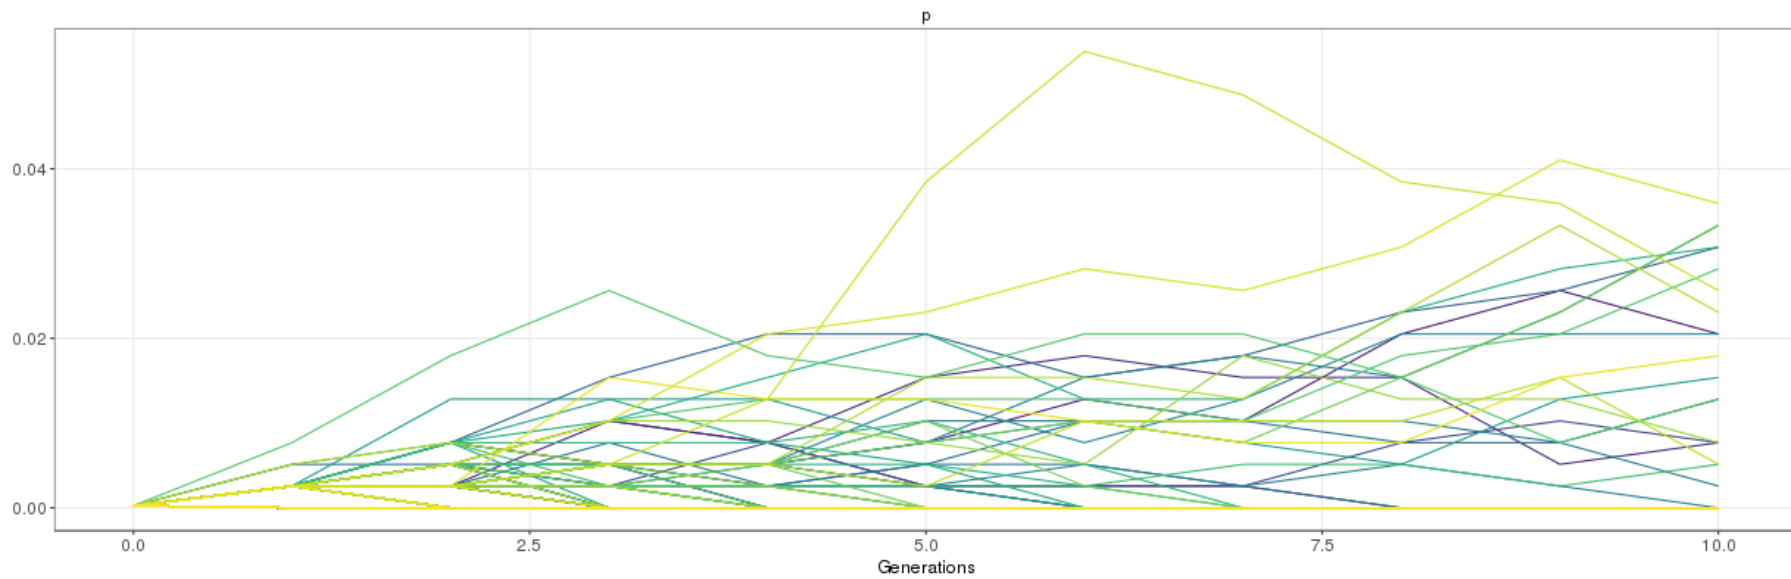

Fixed: 0. Lost: 980.

**Figure S4: Genetic drift simulation for a de novo mutation with start frequency of 0.024% over 10 generations.** Plot shows that in 20 out of 1000 simulations (2%) the de novo mutation is still segregating in the population after 10 generations.
