# Supplementary material
Source: publisher figshare collection journal article supplement (https://plos.figshare.com/articles/dataset/_/7853096)
Supplement: Supplementary file 1 [file 1 › pgen.1008055.s005.pdf]

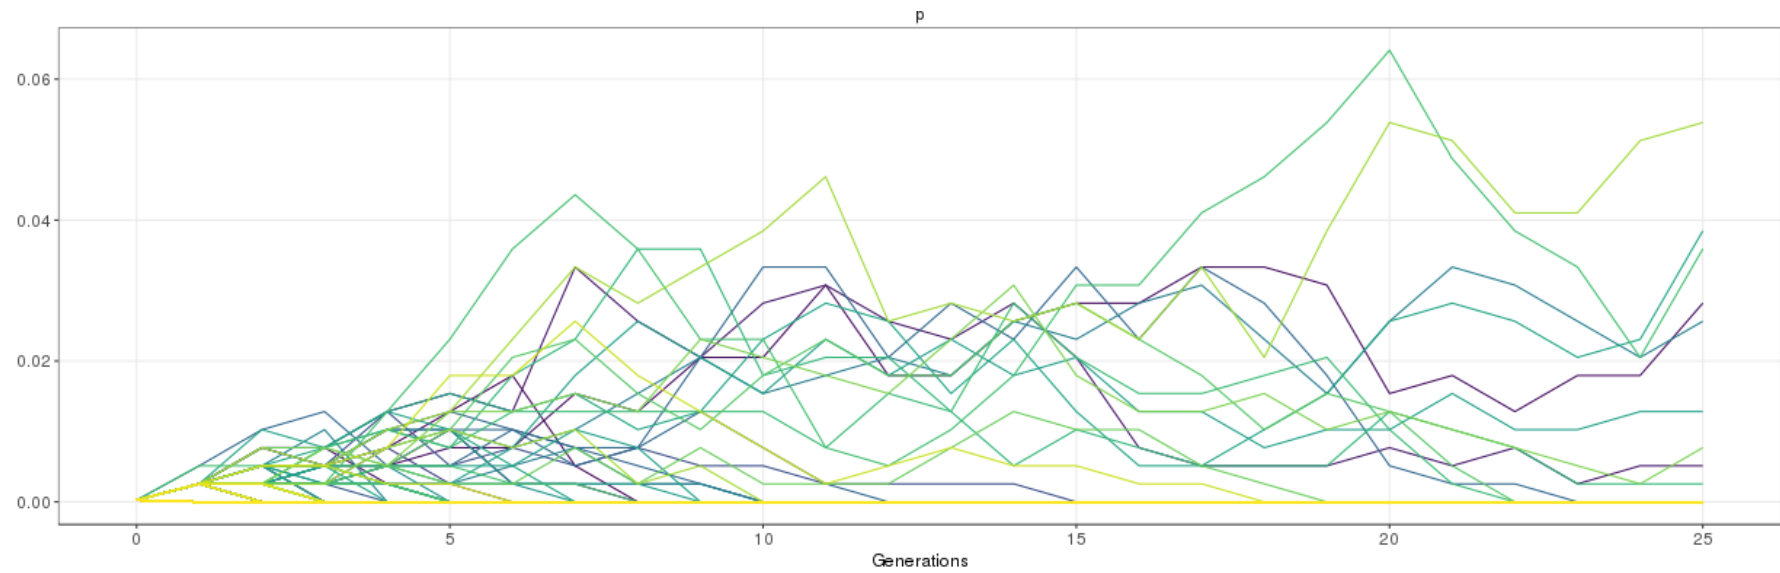

**Figure S5: Genetic drift simulation for a de novo mutation with start frequency of 0.024% over 25 generations.** Plot shows that in 9 out of 1000 simulations (0.9%) the de novo mutation is still segregating in the population after 25 generations.
