# Supplementary material
Source: publisher figshare collection journal article supplement (https://plos.figshare.com/articles/dataset/_/7853096)
Supplement: Supplementary file 1 [file 1 › pgen.1008055.s006.pdf]

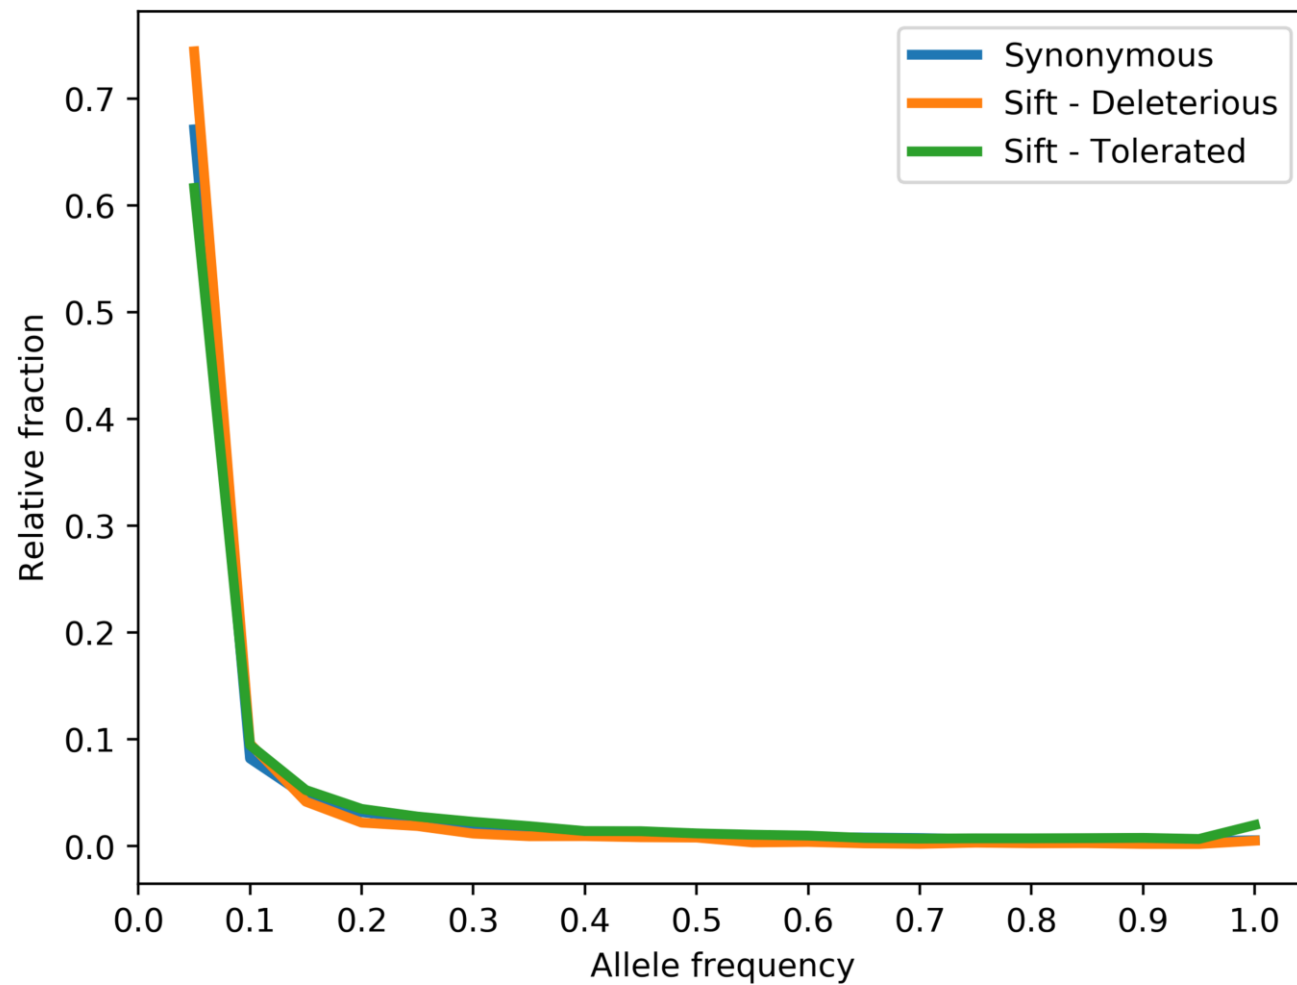

**Figure S6: Allele frequency distribution for synonymous, tolerated, and deleterious missense variants.** Deleterious alleles show a distinct allele frequency spectrum with generally a higher proportion of low-frequency alleles. This is shown by a higher relative fraction of deleterious variants in the lowest allele frequency bin, and relatively fewer fixed deleterious alleles.
