# Supplementary material
Source: publisher figshare collection journal article supplement (https://plos.figshare.com/articles/dataset/_/7853096)
Supplement: Supplementary file 1 [file 1 › pgen.1008055.s007.pdf]

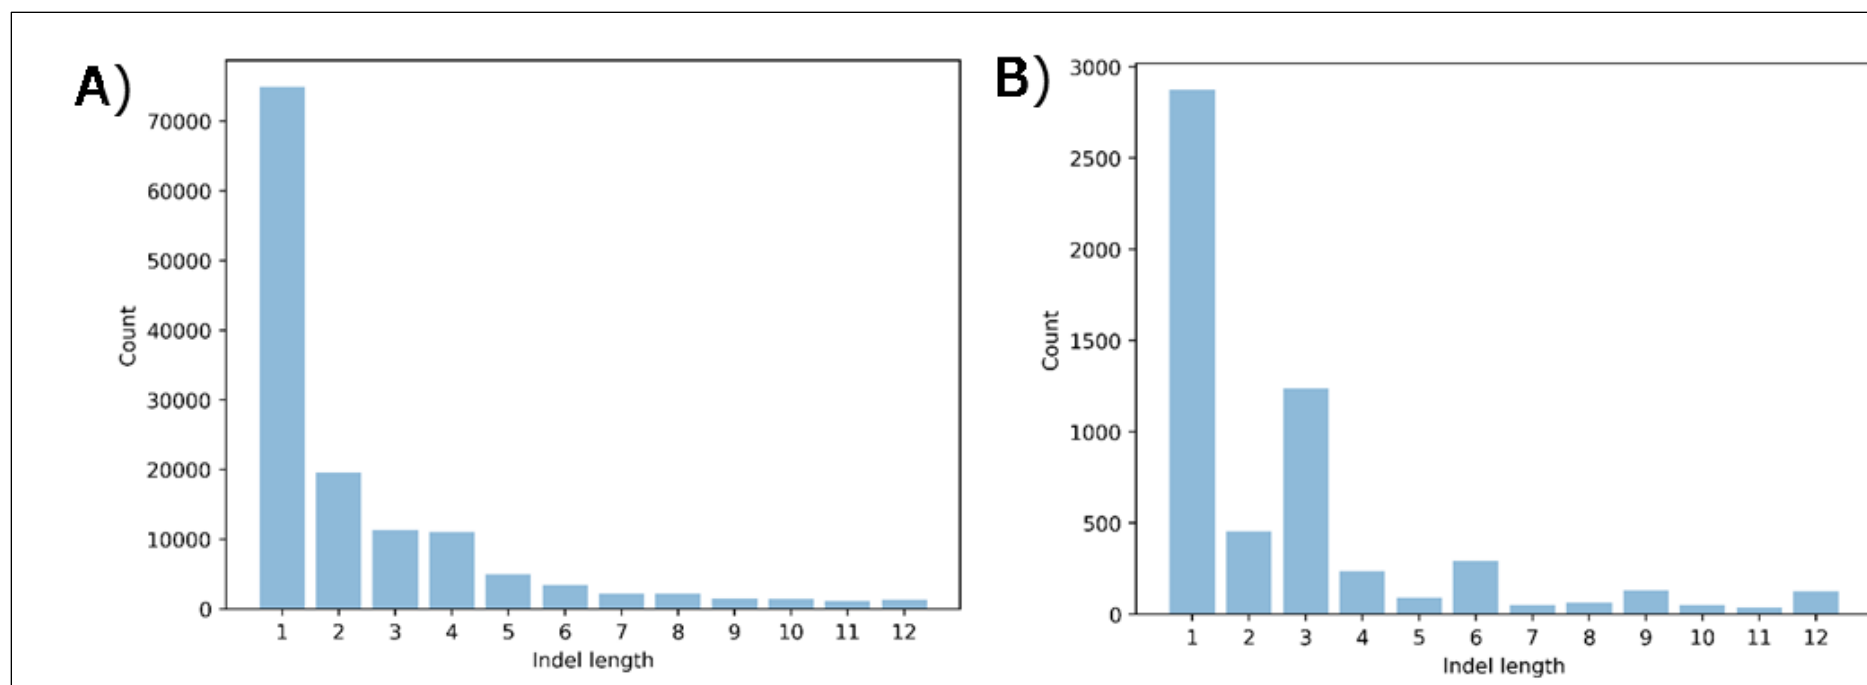

**Figure S7: Enrichment of inframe indels in coding regions. A) Indel length distribution for non-coding regions. B) Indel length distributions for coding regions.** Figure shows an enrichment of inframe indels in coding regions (e.g. length 3,6,9), not shown in non-coding regions.
