# Supplementary material
Source: publisher figshare collection journal article supplement (https://plos.figshare.com/articles/dataset/_/7853096)
Supplement: Supplementary file 1 [file 1 › pgen.1008055.s008.pdf]

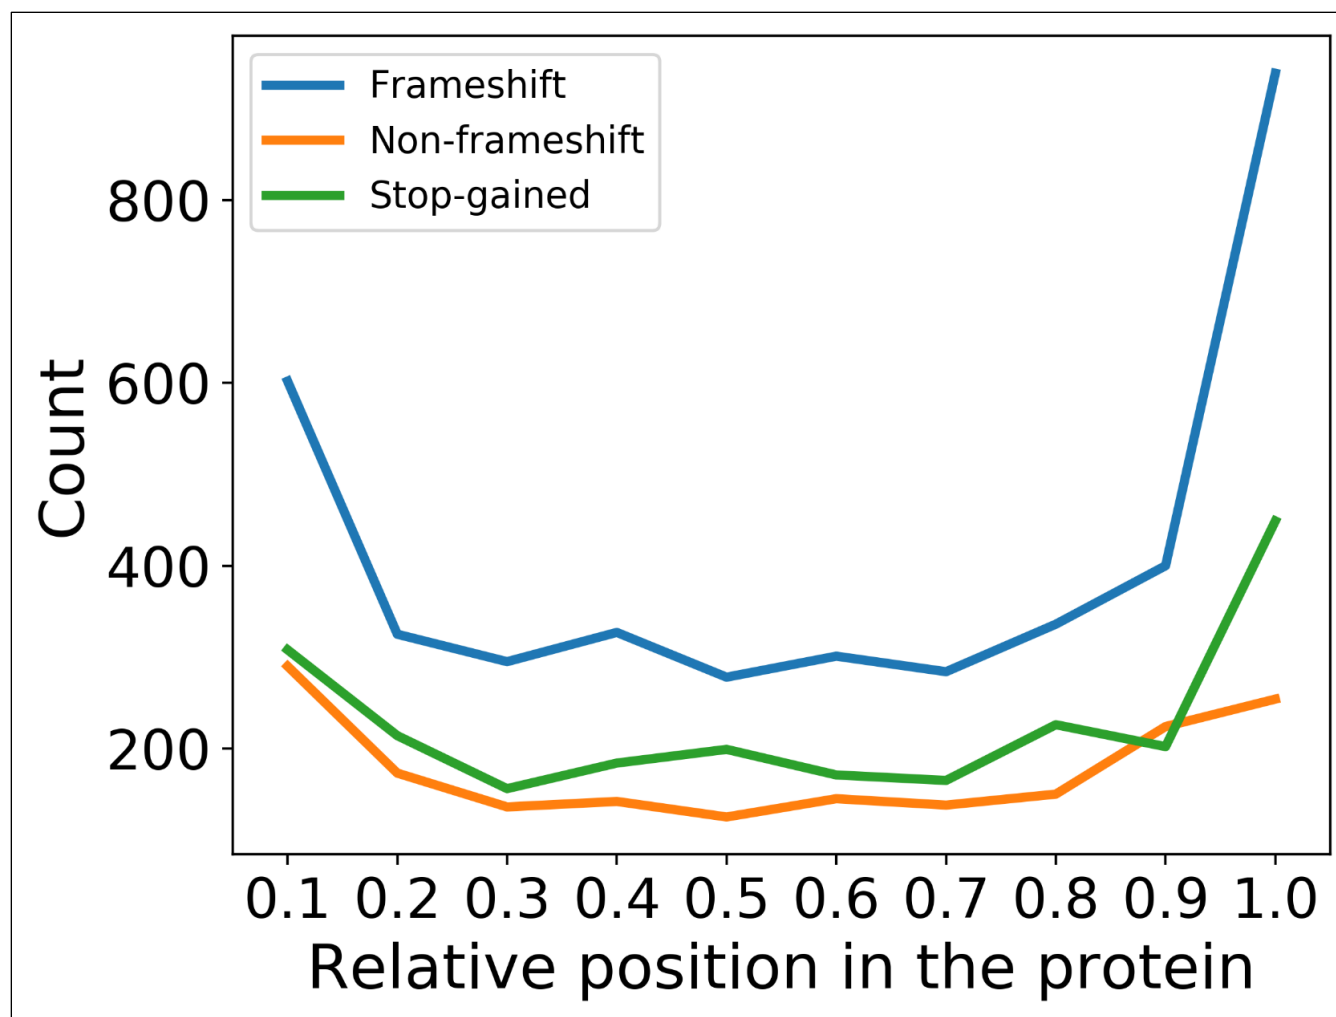

**Figure S8: Relative position in the protein for frameshift, non-frameshift, and stop-gained variants in the pig populations.** Frameshift variants are enriched in N- and C-terminal parts of the protein. Frameshift variants at the N-terminal sites are potentially “rescued” by alternate start-codons. Frameshift variants at the C-terminal end are less likely to be disruptive, since a functional protein might still be translated.
