# Supplementary material
Source: publisher figshare collection journal article supplement (https://plos.figshare.com/articles/dataset/_/7853096)
Supplement: Supplementary file 1 [file 1 › pgen.1008055.s009.pdf]

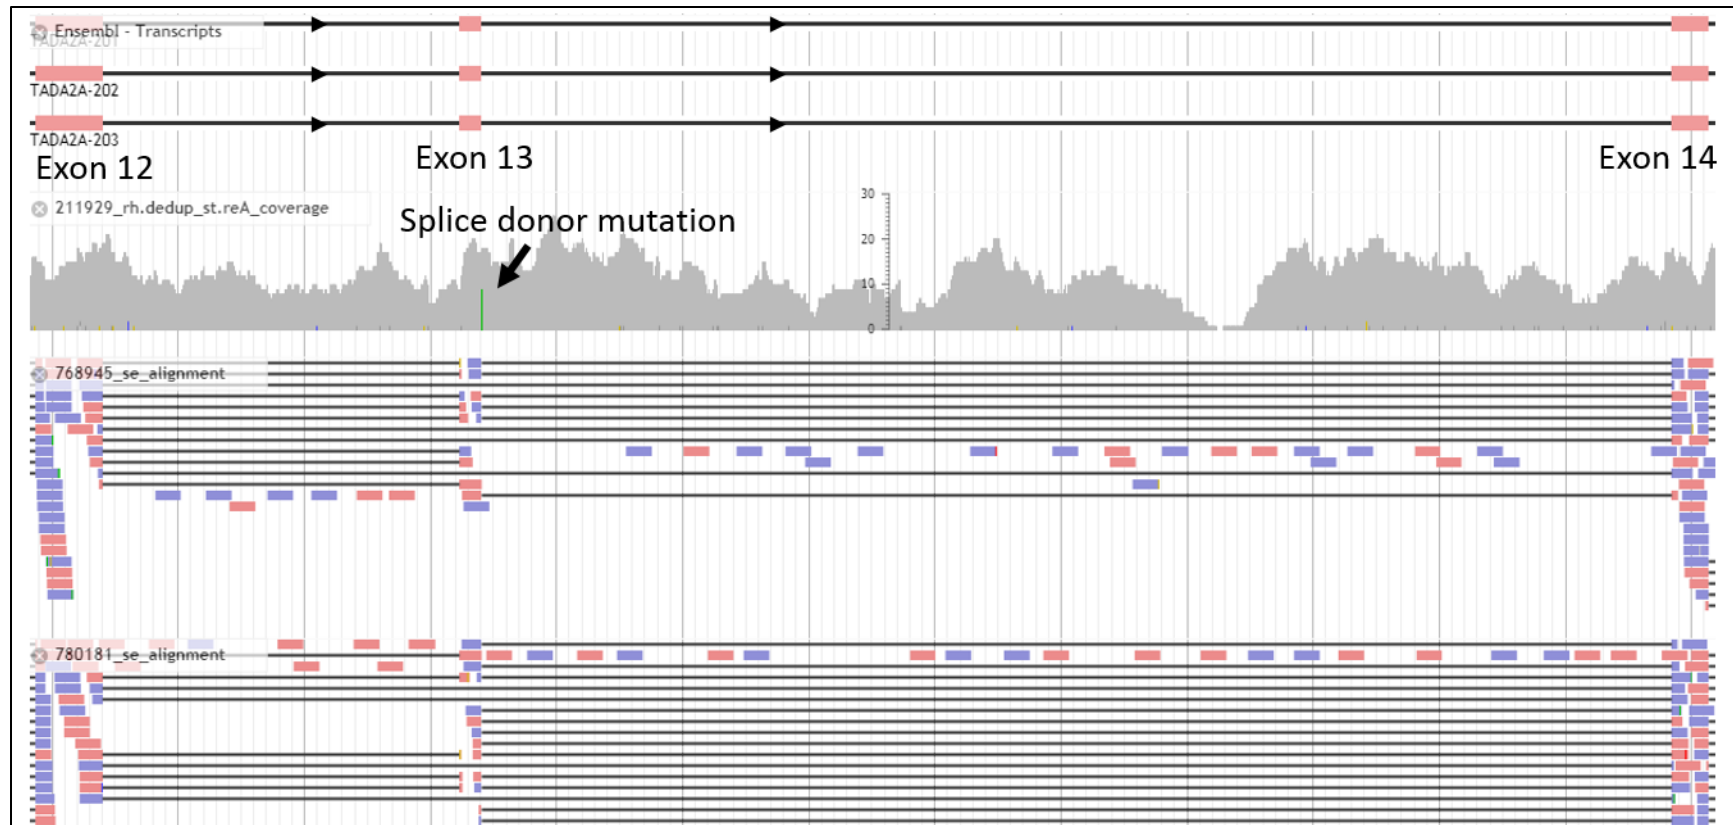

**Figure S9: Screen capture shows exon skipping of *TADA2A* exon 13 in two carriers (768945, 780181) of the DU1 splice-donor mutation.** Figure shows three Ensembl-predicted *TADA2A* transcripts on the forward strand and the coverage track of one carrier animal (L929) including the splice-donor mutation indicated with an arrow. The RNA-seq alignments show that both carrier samples exhibit four reads that splice directly from exon 12 to exon 14, not observed for non-carrier animals.
