# Supplementary material
Source: publisher figshare collection journal article supplement (https://plos.figshare.com/articles/dataset/_/7853096)
Supplement: Supplementary file 1 [file 1 › pgen.1008055.s010.pdf]

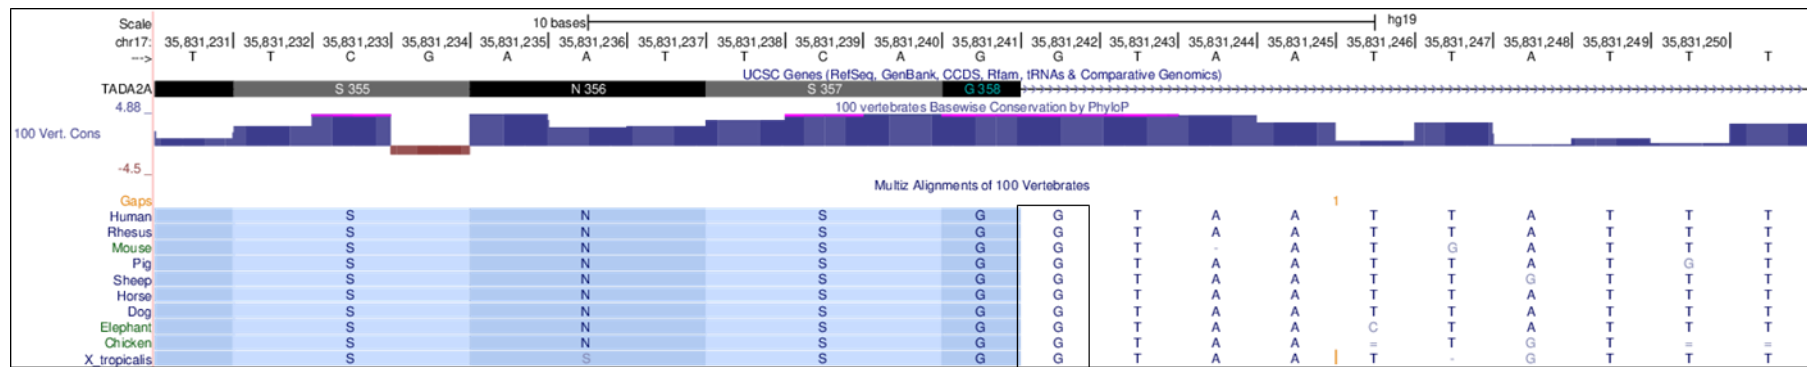

**Figure S10: UCSC screen capture showing sequence conservation for the GT splice dinucleotide site in the *TADA2A* gene.** Figure shows the human homologous sequence of the splice-donor site including the alignment of 8 mammalian, and two non-mammalian species (chicken and frog). The track '100 Vert. Cons' shows the basewise PhyloP sequence conservation scores. Figure shows complete conservation of the affected *TADA2A* splice-donor site region in all 10 species. The *TADA2A* affected splice-donor position is indicated in the black box.
