# Supplementary material
Source: publisher figshare collection journal article supplement (https://plos.figshare.com/articles/dataset/_/7853096)
Supplement: Supplementary file 1 [file 1 › pgen.1008055.s011.pdf]

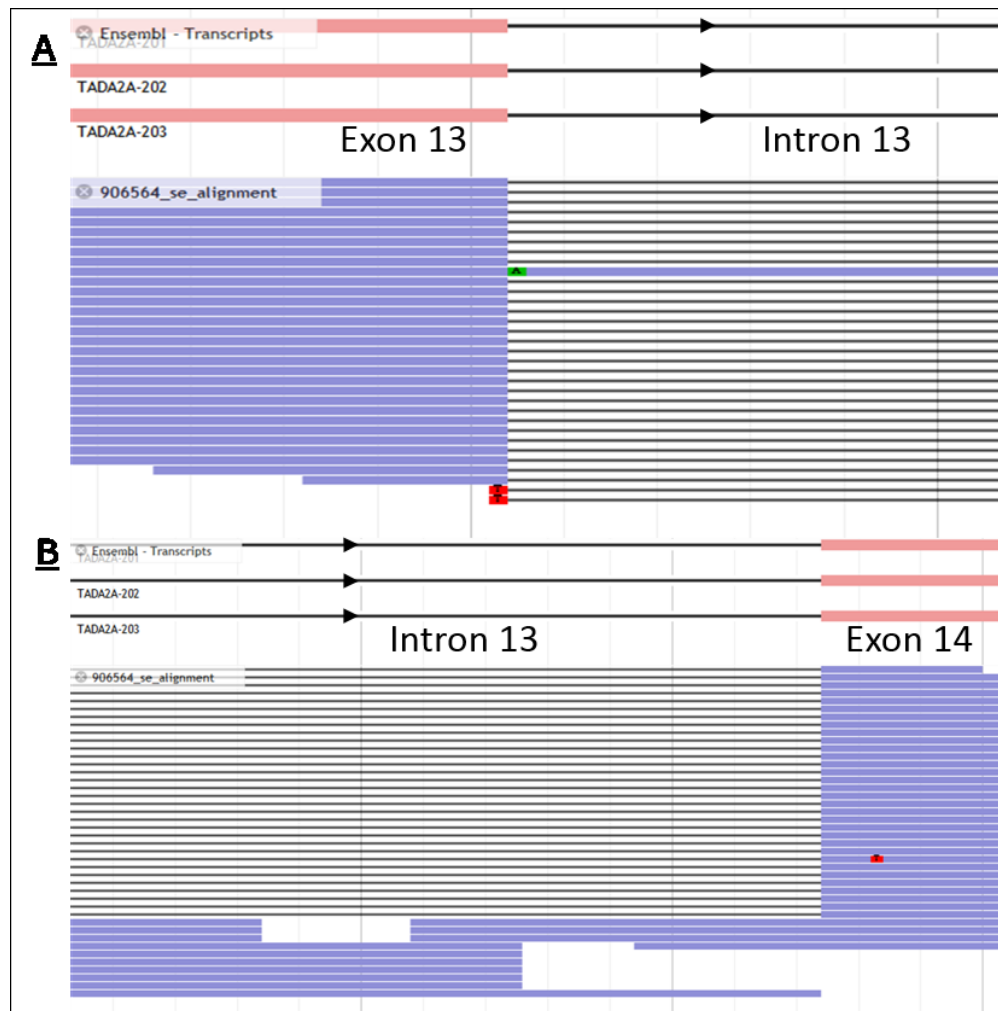

**Figure S11: Screen capture of intron retention for one DU1 carrier sample (906564) at the 5' (A), and 3' end (B) of *TADA2A* intron 13 caused by the DU1 splice-donor mutation.** Figure shows three Ensembl-predicted *TADA2A* transcripts on the forward strand and the alignment track of one carrier animal (906564). A). Exon 13-intron 13 splice region showing one read supporting intron retention. B). Exon 14-intron 13 splice region showing four read supporting intron retention.
