# Supplementary material
Source: publisher figshare collection journal article supplement (https://plos.figshare.com/articles/dataset/_/7853096)
Supplement: Supplementary file 1 [file 1 › pgen.1008055.s012.pdf]

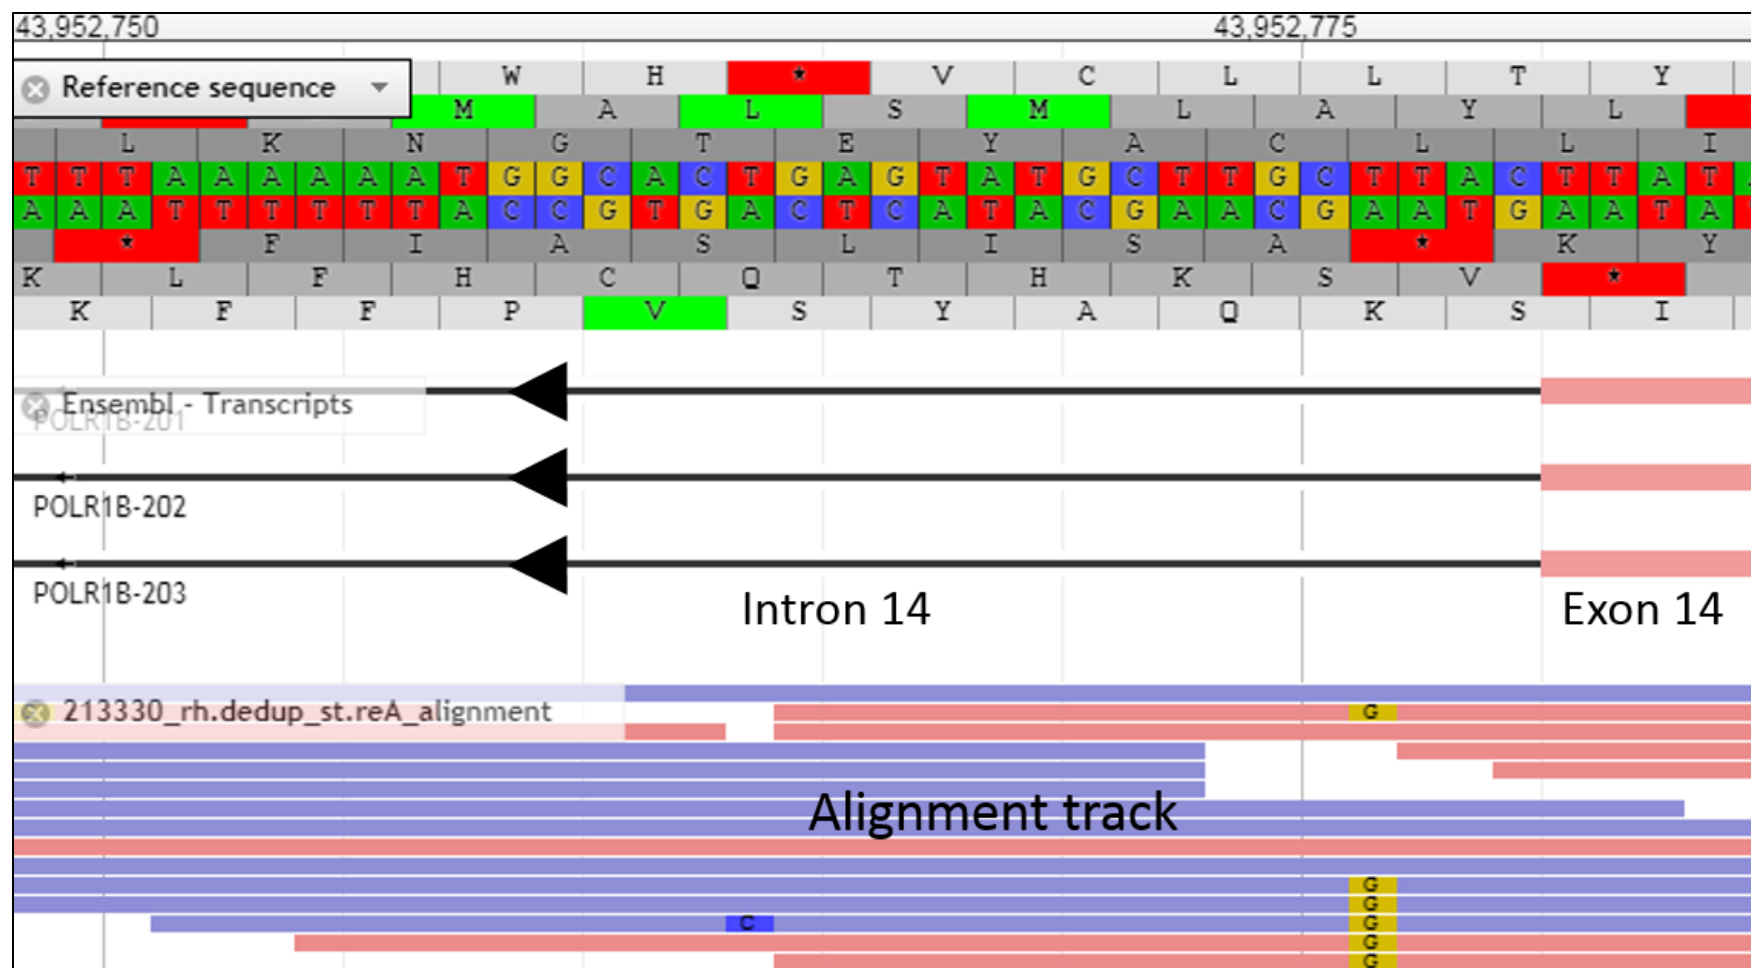

**Figure S12: Screen capture showing the splice region mutation in intron 14 of the *POLR1B* gene in one of the LA1 carrier animals (L330).** Figure shows the reference sequence for the tail of exon 14 and the start of intron 14 of *POLR1B* and three Ensembl-predicted *POLR1B* transcripts on the negative strand. The alignment track shows the all aligned reads and variants per position. The splice mutation affects a conserved adenine in the GTRAG splice site motif on the negative strand.
