# Supplementary material
Source: publisher figshare collection journal article supplement (https://plos.figshare.com/articles/dataset/_/7853096)
Supplement: Supplementary file 1 [file 1 › pgen.1008055.s014.pdf]

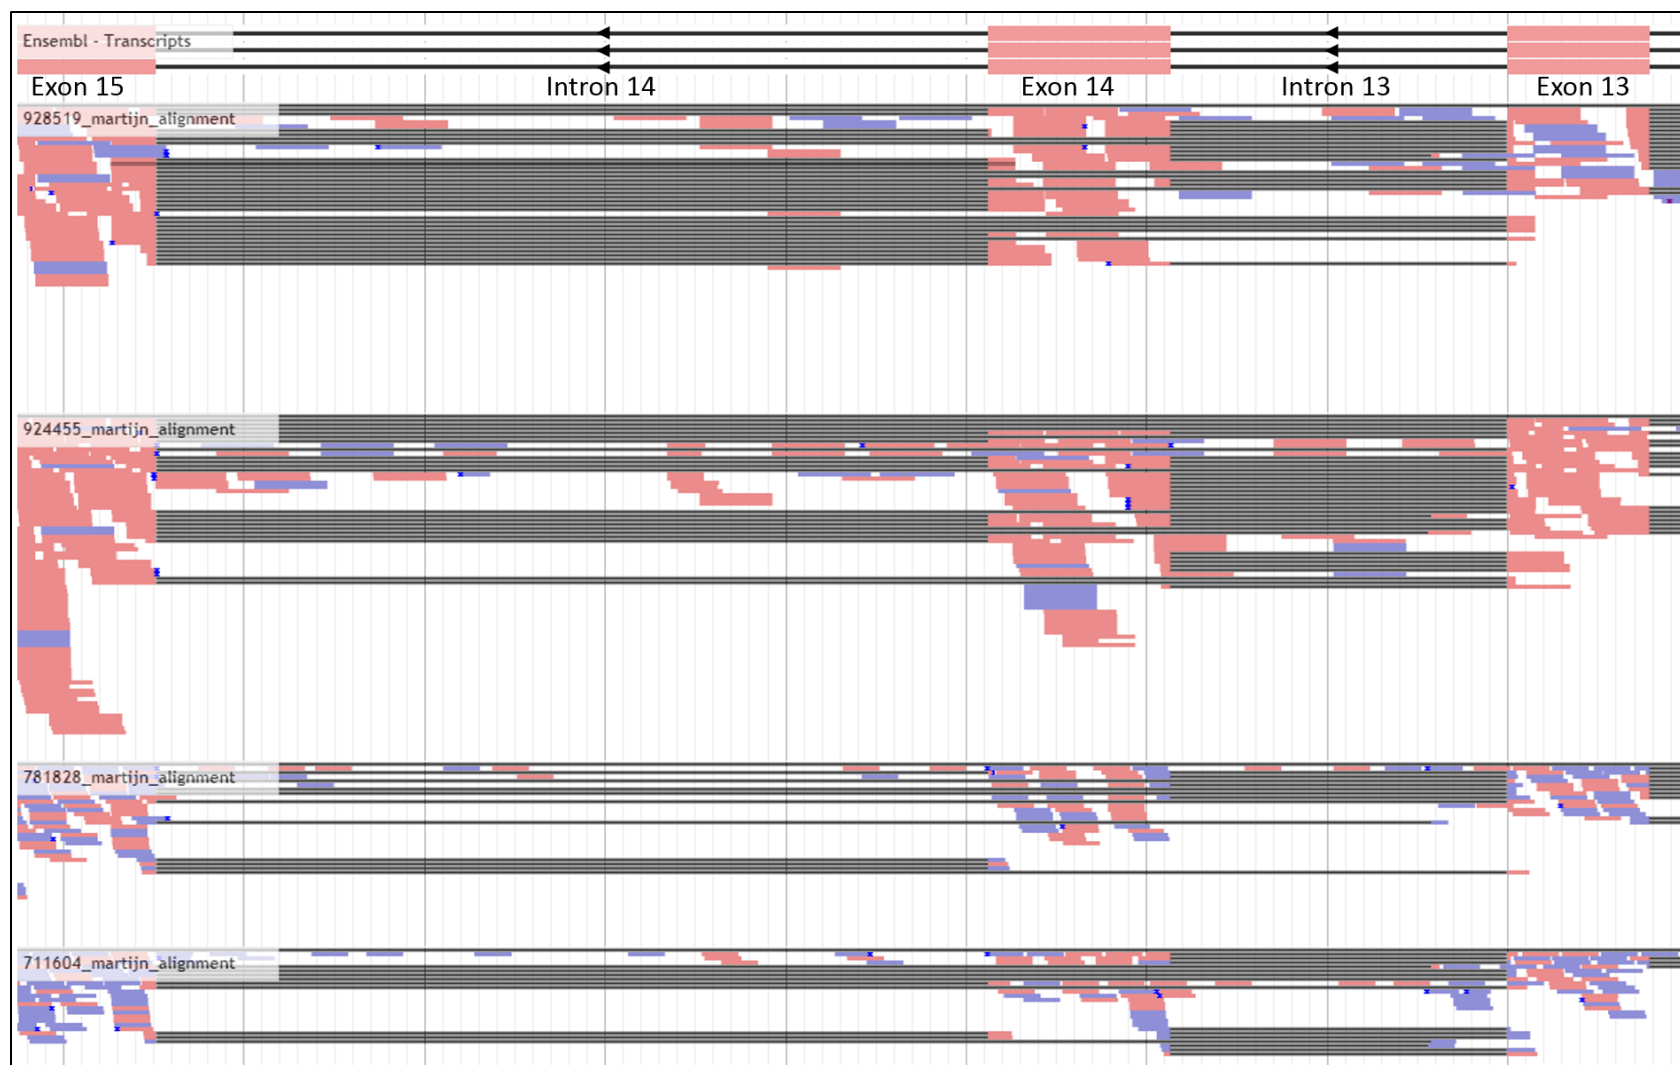

**Figure S14: Screen capture of exon skipping (indicated by grey lines) in the *POLR1B* gene (exon 14) caused by the 3:g.43952776T>G splice region mutation.** Figure shows three Ensembl-predicted *POLR1B* transcripts on the reverse strand and the alignment track of four carrier animals (928519, 924455, 781828, 711604).
