# Supplementary material
Source: publisher figshare collection journal article supplement (https://plos.figshare.com/articles/dataset/_/7853096)
Supplement: Supplementary file 1 [file 1 › pgen.1008055.s015.pdf]

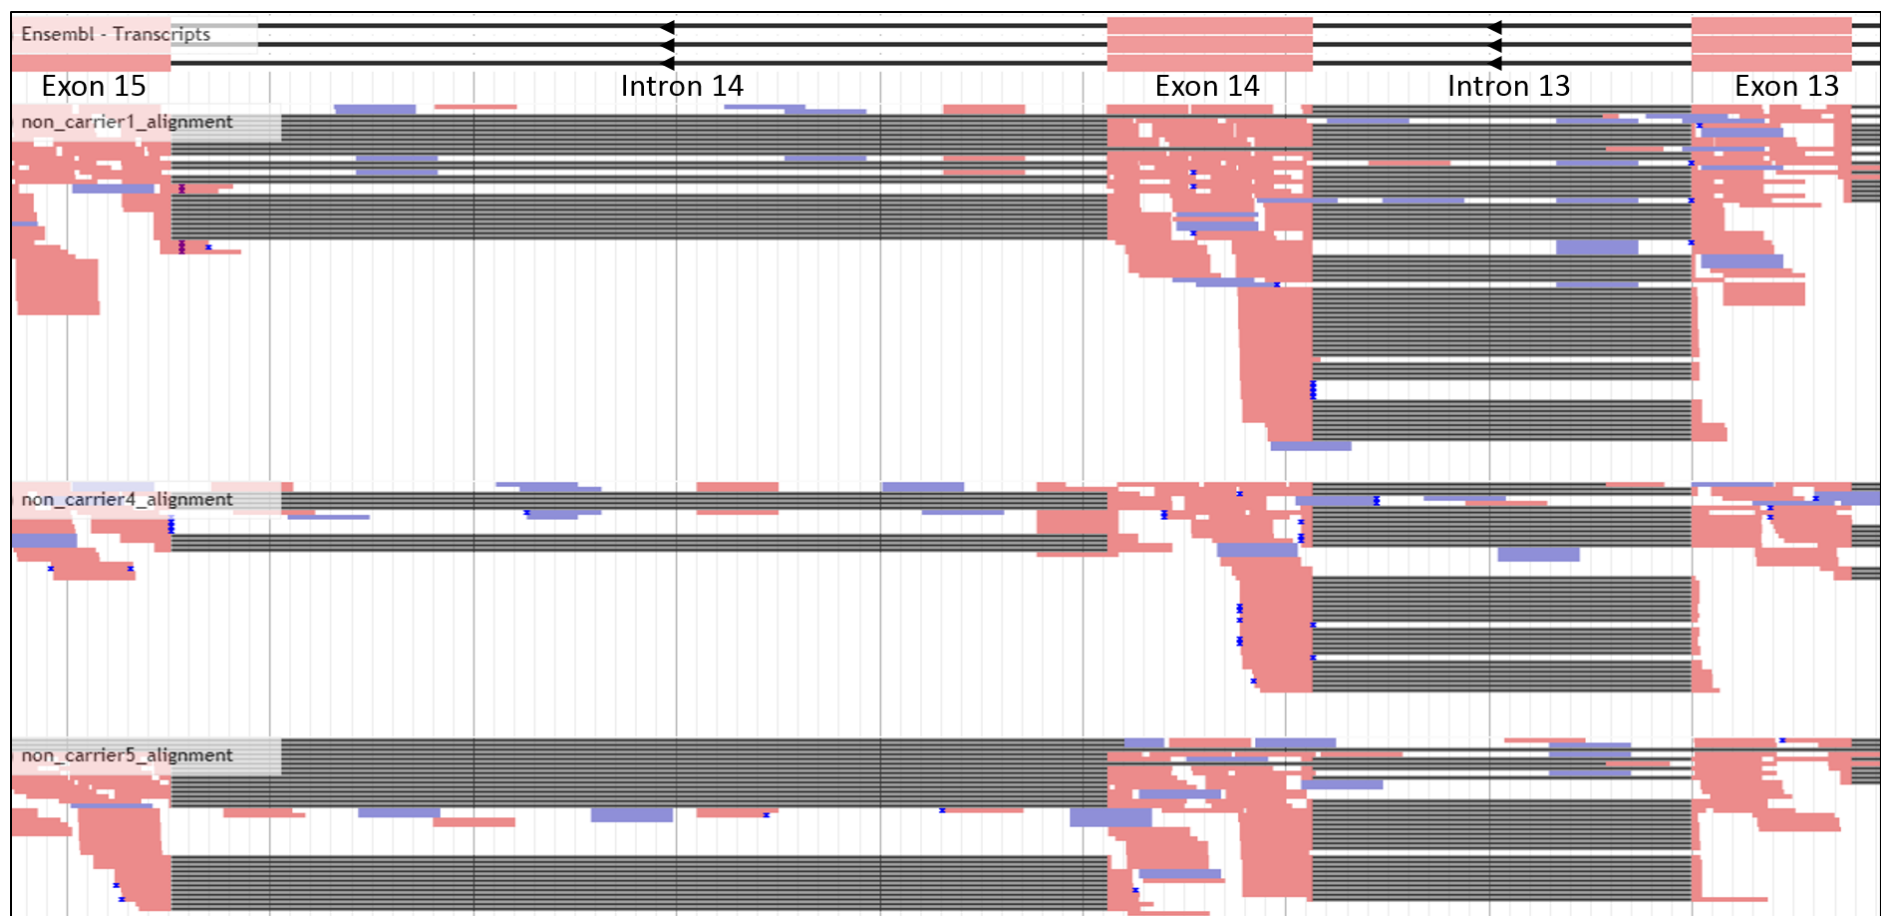

**Figure S15: Screen capture of three non-carrier animals of the LA1 splice-region mutation.** Figure shows three Ensembl-predicted *POLR1B* transcripts on the reverse strand and the alignment track of three non-carrier animals. Non-carriers show no exon-skipping of *POLR1B* exon 14.
