# Supplementary material
Source: publisher figshare collection journal article supplement (https://plos.figshare.com/articles/dataset/_/7853096)
Supplement: Supplementary file 1 [file 1 › pgen.1008055.s016.pdf]

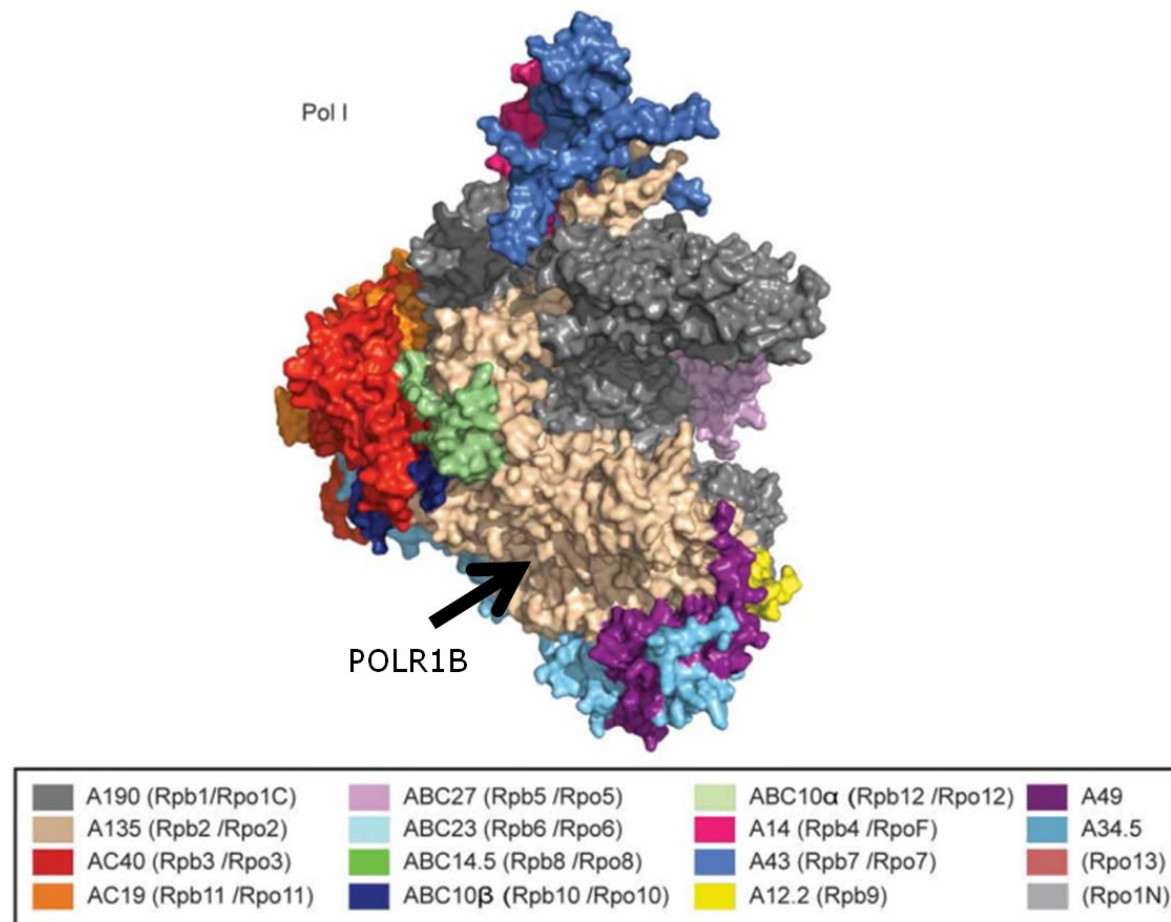

**Figure S16: Protein structure of RNA-polymerase 1.** Figure shows all subunits including the A135 subunit encoded by the LA1 affected *POLR1B* gene (indicated with an arrow). Figure adjusted from Fernandez-Tornero et al. 2013 (Fernandez-Tornero et al. 2013).

Fernandez-Tornero C, Moreno-Morcillo M, Rashid UJ, Taylor NM, Ruiz FM, Gruene T, Legrand P, Steuerwald U, Muller CW. 2013. Crystal structure of the 14-subunit RNA polymerase I. *Nature* **502**: 644-649.
