# Supplementary material
Source: publisher figshare collection journal article supplement (https://plos.figshare.com/articles/dataset/_/7853096)
Supplement: Supplementary file 1 [file 1 › pgen.1008055.s017.pdf]

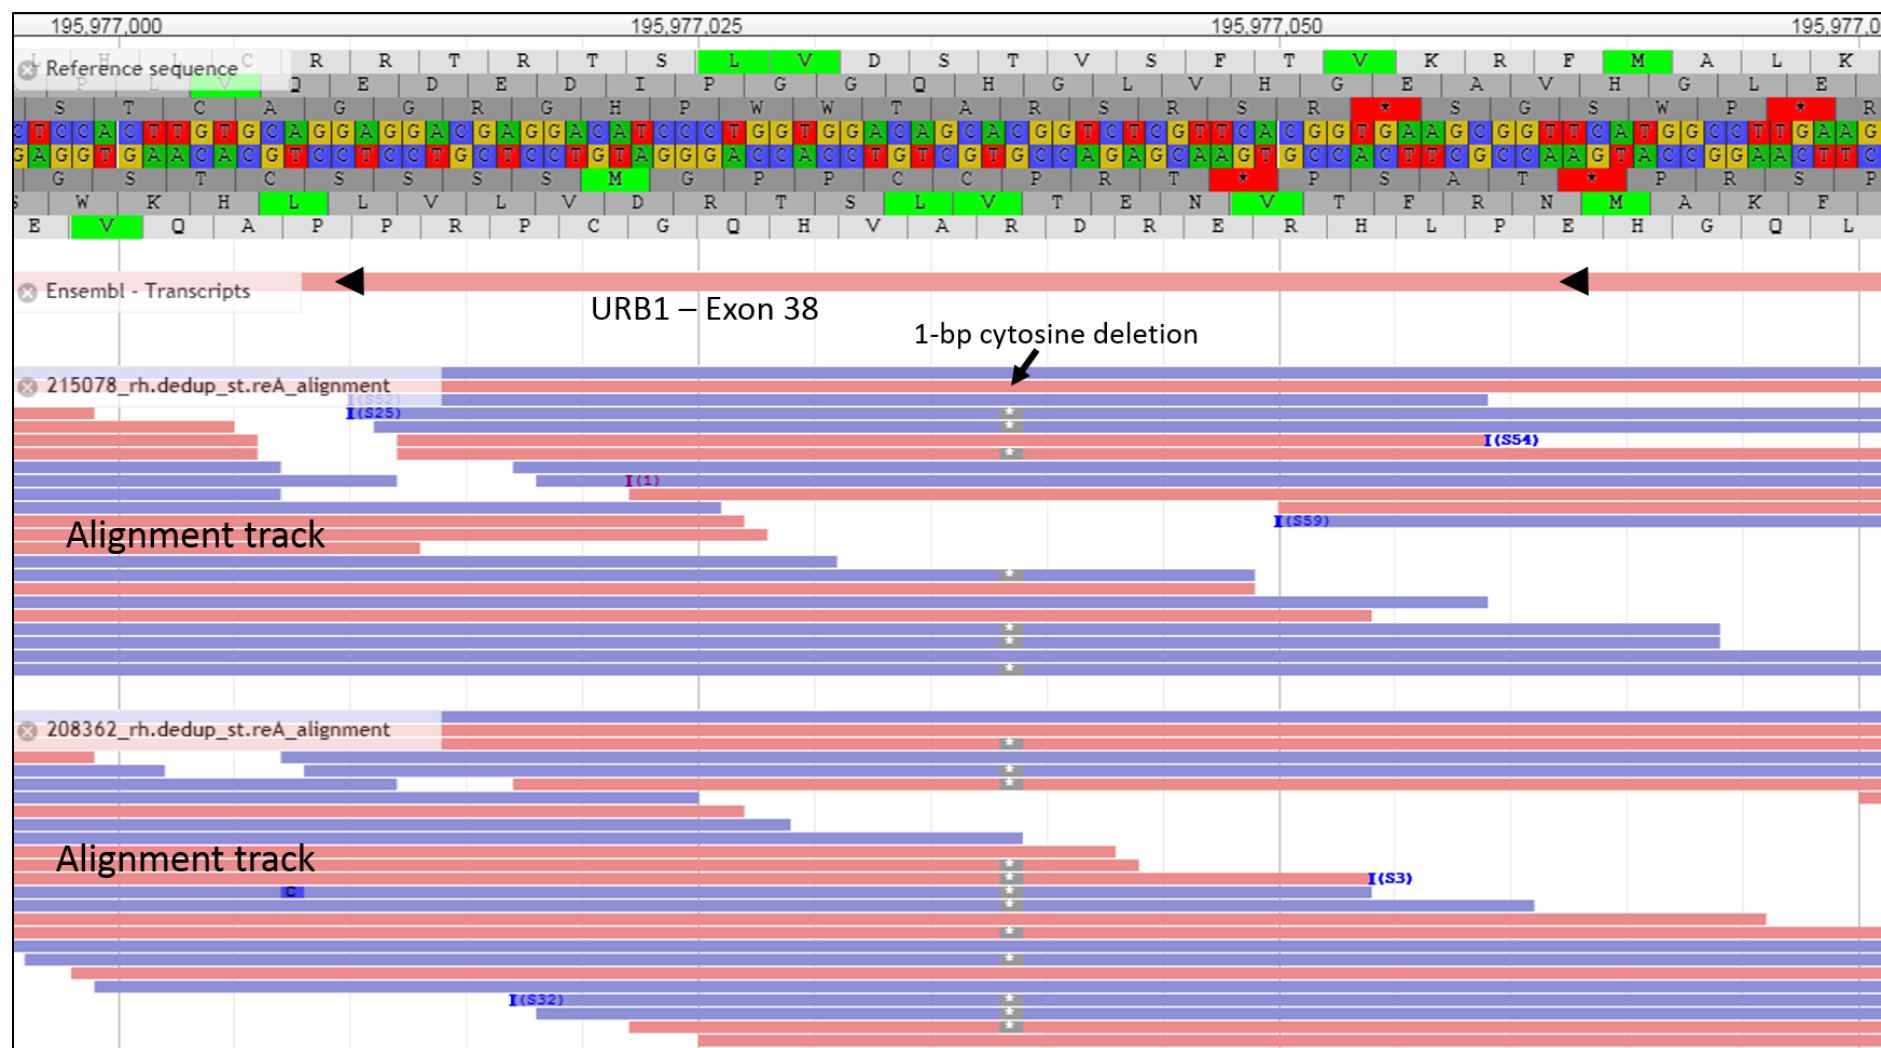

**Figure S17: Screen capture of two carrier animals (L078, L362) for the LA2 (p.Val1961fs) frameshift mutation.** Figure shows the single Ensembl-predicted URB1 transcript on the reverse strand and the alignment track of two LA2 carrier animals. The 1 basepair deletion in the coding region of exon 38 in the *URB1* gene is indicated with an arrow.
