# Supplementary material
Source: publisher figshare collection journal article supplement (https://plos.figshare.com/articles/dataset/_/7853096)
Supplement: Supplementary file 1 [file 1 › pgen.1008055.s018.pdf]

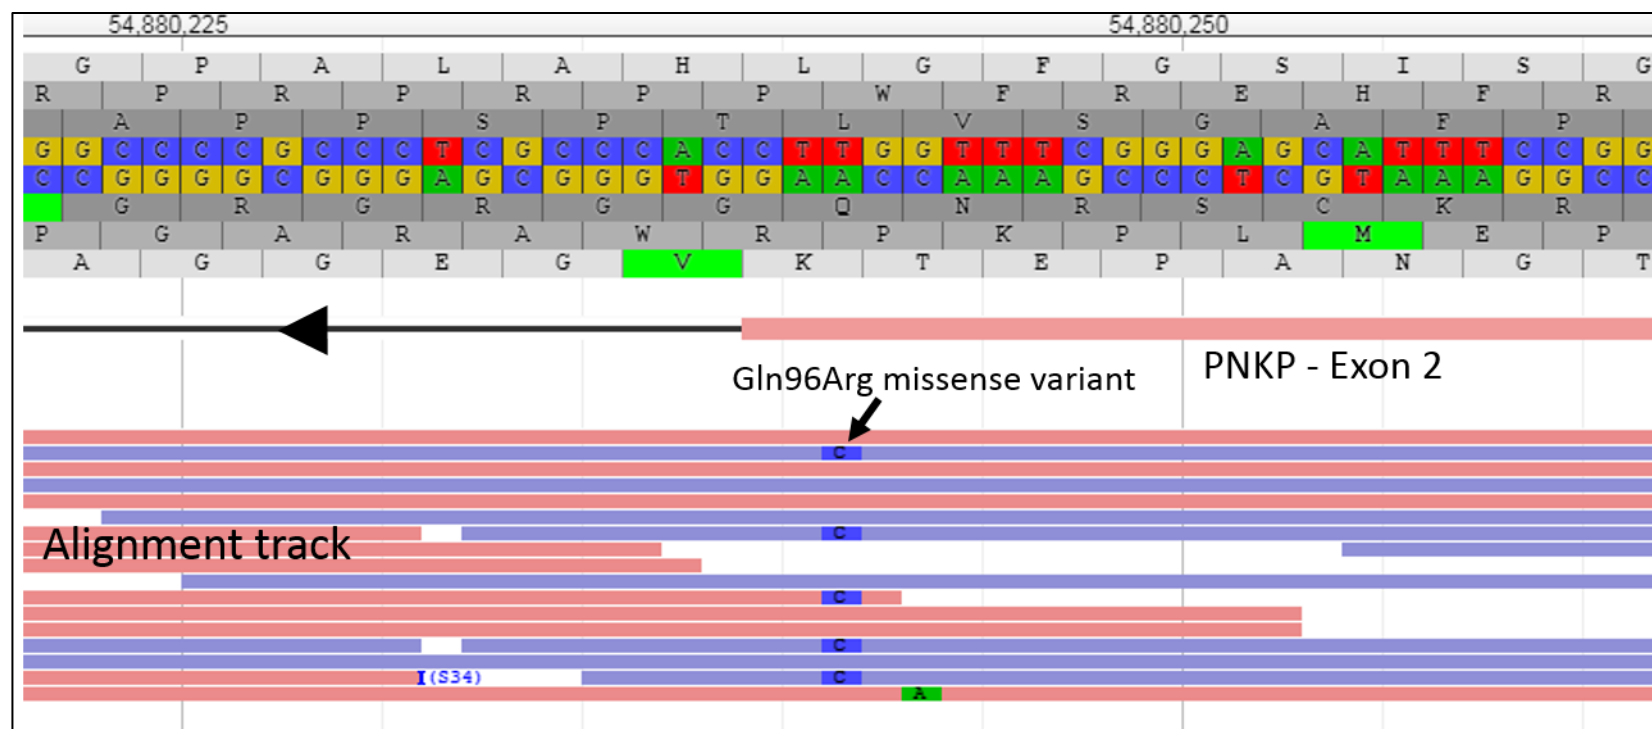

**Figure S18: Screen capture of one carrier animals (L827) for the LA3 missense mutation.** Figure shows the tail of *PNKP* exon 2 including the 6:g.54880241G>T substitution resulting in a deleterious ENSSCP00000003467:p.Gln96Arg substitution in the PNKP protein.
