# Supplementary material
Source: publisher figshare collection journal article supplement (https://plos.figshare.com/articles/dataset/_/7853096)
Supplement: Supplementary file 1 [file 1 › pgen.1008055.s019.pdf]

|            |                                                              |
|------------|--------------------------------------------------------------|
| Pig_WT     | LESPPGGAPPIFLPSDGQALVLGRGPLTLVTDKCSRNQVELVADPETRTVAVKQLGVNP  |
| Pig_Mutant | LESPPGGAPPIFLPSDGQALVLGRGPLTLVTDKCSRNQVELVADPETRTVAVKQLGVNP  |
| Human      | LESPPGGAPPIFLPSDGQALVLGRGPLTQVTDKCSRTQVELVADPETRTVAVKQLGVNP  |
| Chimpanzee | LESPPGGAPPIFLPSDGQALVLGRGPLTQVTDKCSRTQVELVADPETRTVAVKQLGVNP  |
| Dog        | LESPPGGAPPIFLPSDGQALVLGRGPLTQVTDKCSRNQVELVANPRTRTVAVKQLGINP  |
| Cattle     | LESPAGGAPPIFLPTGGQALVLGRGPLTQVTDKCSRNQVELVADPETRTVAVKQLGVNP  |
| Mouse      | LQSPTGGPPPIFLPSDGQALVLGRGPLTQVTDKCSRNQVELIADPESRTVAVKQLGVNP  |
| Zebrafish  | LVSVD--GDRVVLPDGRALMFGRGPESRISDKKCSRHQVKLVADYAKQEVLTQLGPNP   |
| Fruit_fly  | LKPTEPE-HHSIHL-TAGENFVGRSRETGIRDSKSKRQIQQLQVDLKKAVVSLKVLGVNP |
|            | * . . . ** . : : * *** : ::* . : * :. ** **                  |

**Figure S19: PNKP multiple sequence alignment.** Figure shows the protein alignment of 6 mammalian, and two non-mammalian species (zebrafish, fruitfly). The PNKP (ENSSSCP00000003467:p.Gln96Arg) missense position (indicated with a blue box) is fully conserved across a wide range of vertebrate species.
