# Supplementary material
Source: publisher figshare collection journal article supplement (https://plos.figshare.com/articles/dataset/_/7853096)
Supplement: Supplementary file 1 [file 1 › pgen.1008055.s020.pdf]

**Table S1: Number of genotypes and sequenced individuals.** The number of trios are the number of genotyped animals that have both parents genotyped.

| Breed    | #80K genotyped | #Trio's | #Duo's | #WGS |
|----------|----------------|---------|--------|------|
| Landrace | 28,085         | 15,631  | 10,792 | 167  |
| Duroc    | 11,255         | 3,497   | 7,498  | 119  |
