# Supplementary material
Source: publisher figshare collection journal article supplement (https://plos.figshare.com/articles/dataset/_/7853096)
Supplement: Supplementary file 1 [file 1 › pgen.1008055.s021.pdf]

**Table S2: Phenotype records for CxC and CxNC matings (TNB: total number born, NBA: number born alive, NSB: number stillborn, MUM: number mummified).** The number of mummified piglets is not recorded on every farm, resulting in fewer phenotype records.

| Hap. | # CxC (TNB/NBA/NSB) | # CxC (MUM) | #CxNC (TNB/NBA/NSB) | #CxNC (MUM) |
|------|---------------------|-------------|---------------------|-------------|
| LA1  | 297                 | 106         | 2,350               | 778         |
| LA2  | 127                 | 49          | 1,527               | 513         |
| LA3  | 30                  | 11          | 872                 | 294         |
| LA4  | 29                  | 5           | 950                 | 300         |
| DU1  | 21                  | 1           | 293                 | 37          |
