# Supplementary material
Source: publisher figshare collection journal article supplement (https://plos.figshare.com/articles/dataset/_/7853096)
Supplement: Supplementary file 1 [file 1 › pgen.1008055.s022.pdf]

**Table S3: Fertility phenotypes for liveborn, stillborn, and mummified piglets for CxC litters compared to CxNC litters.** CxC litters show clear reduction in liveborn (12.1-23%). However, no increase in the number of stillbirths or the number mummified piglets is observed.

| Haplotype | Phenotype | CxC mean | CxNC mean | Ratio | P-val     |
|-----------|-----------|----------|-----------|-------|-----------|
| LA1       | TOTALBORN | 11.51    | 14.18     | 0.814 | <0.000001 |
| LA2       | TOTALBORN | 12.00    | 14.26     | 0.841 | <0.000001 |
| LA3       | TOTALBORN | 11.96    | 14.09     | 0.849 | 0.00064   |
| LA4       | TOTALBORN | 11.48    | 14.05     | 0.817 | 0.0075    |
| DU1       | TOTALBORN | 7.33     | 9.35      | 0.784 | 0.0028    |
| LA1       | LIVEBORN  | 10.67    | 12.93     | 0.825 | <0.000001 |
| LA2       | LIVEBORN  | 11.19    | 13.04     | 0.858 | <0.000001 |
| LA3       | LIVEBORN  | 11.37    | 12.92     | 0.880 | 0.0068    |
| LA4       | LIVEBORN  | 10.72    | 12.84     | 0.835 | 0.013     |
| DU1       | LIVEBORN  | 6.62     | 8.54      | 0.775 | 0.006     |
| LA1       | STILLBORN | 0.85     | 1.26      | 0.675 | <0.000001 |
| LA2       | STILLBORN | 0.81     | 1.23      | 0.859 | 0.007     |
| LA3       | STILLBORN | 0.60     | 1.15      | 0.522 | 0.11      |
| LA4       | STILLBORN | 0.76     | 1.21      | 0.628 | 0.11      |
| DU1       | STILLBORN | 0.80     | 0.91      | 0.879 | 0.65      |
| LA1       | MUMMIES   | 0.45     | 0.42      | 1.072 | 0.83      |
| LA2       | MUMMIES   | 0.18     | 0.42      | 0.437 | 0.0028    |
| LA3       | MUMMIES   | 0.09     | 0.48      | 0.19  | 0.0021    |
| LA4       | MUMMIES   | 0.2      | 0.39      | 0.517 | 0.41      |
| DU1       | MUMMIES   | 0        | 0.162     | 0.000 | -         |
