# Supplementary material
Source: publisher figshare collection journal article supplement (https://plos.figshare.com/articles/dataset/_/7853096)
Supplement: Supplementary file 1 [file 1 › pgen.1008055.s023.pdf]

**Table S4: WGS carrier animals for candidate lethal haplotypes.** Table shows the carrier IDs of all identified carriers of the recessive lethal haplotypes.

| Hap. | # WGS carriers | Carrier identifiers                                                                                          |
|------|----------------|--------------------------------------------------------------------------------------------------------------|
| LA1  | 21             | L528,L051,L134,L138,L330,L156,L167,L179,L181,L191,L196,L197,L891,L911,L957,L958,<br>L972,L976,L988,L991,L029 |
| LA2  | 17             | L528,L965,L362,L078,L147,L151,L163,L174,L175,L200,L892,L898,L921,L991,L006,L008,L049                         |
| LA3  | 7              | L175,L185,L827,L844,L936,L944,L002                                                                           |
| LA4  | 9              | L330,L156,L067,L197,L202,L911,L970,L972,L024                                                                 |
| DU1  | 9              | D833, D929, D917,D929,D948,D964,D981,D035,D416                                                               |
