# Supplementary material
Source: publisher figshare collection journal article supplement (https://plos.figshare.com/articles/dataset/_/7853096)
Supplement: Supplementary file 1 [file 1 › pgen.1008055.s024.pdf]

**Table S5: Per-haplotype RNA-seq carrier animals.** Table shows the birth date and sequenced tissue for each carrier animal. No RNA-seq data for LA3 or LA4 carriers was available.

| Haplotype | Carrier identifiers | Birth date | Tissue |
|-----------|---------------------|------------|--------|
| LA1       | 711604              | 29.08.2010 | Testis |
| LA1       | 781828              | 20.11.2011 | Testis |
| LA1       | 924455              | 05.05.2014 | Testis |
| LA1       | 928519              | 05.05.2014 | Testis |
| LA2       | 880613              | 09.07.2013 | Testis |
| LA2       | 883315              | 03.08.2013 | Testis |
| LA2       | 906554              | 17.12.2013 | Testis |
| DU1       | 768945              | 07.09.2011 | Testis |
| DU1       | 780181              | 16.11.2011 | Testis |
| DU1       | 906564              | 13.12.2013 | Testis |
