# Supplementary material
Source: publisher figshare collection journal article supplement (https://plos.figshare.com/articles/dataset/_/7853096)
Supplement: Supplementary file 1 [file 1 › pgen.1008055.s025.xlsx]

## Sheet: DU1
Table S6: Genomic variation in high LD with the DU1 haplotype.
Chromosome	Type	Position	Ref	Alt	Allele frequency	Type	Gene symbol	Gene ID	Affected intron	LD (r2)
12	SNP	38439268	G	[A]	0.0416667	intergenic_variant	-	-	-	1
12	SNP	38439527	C	[T]	0.0416667	intergenic_variant	-	-	-	1
12	SNP	38478462	G	[C]	0.0416667	intron_variant	AATF	ENSSSCG00000017693	4/11	1
12	INDEL	38527166	AGTG	[AG]	0.0416667	intron_variant	AATF	ENSSSCG00000017693	8/11	1
12	SNP	38534603	C	[T]	0.0486111	intron_variant	AATF	ENSSSCG00000017693	10/11	0.899833
12	SNP	38639987	T	[A]	0.0416667	intron_variant	ACACA	ENSSSCG00000017694	45/55	1
12	SNP	38654913	A	[G]	0.0416667	intron_variant	ACACA	ENSSSCG00000017694	41/55	1
12	SNP	38657216	T	[C]	0.0416667	intron_variant	ACACA	ENSSSCG00000017694	41/55	1
12	SNP	38703808	C	[T]	0.0416667	intron_variant	ACACA	ENSSSCG00000017694	29/55	1
12	SNP	38710501	G	[C]	0.0416667	intron_variant	ACACA	ENSSSCG00000017694	29/55	1
12	SNP	38710736	C	[T]	0.0486111	intron_variant	ACACA	ENSSSCG00000017694	29/55	0.899833
12	SNP	38734517	G	[A]	0.0416667	intron_variant	ACACA	ENSSSCG00000017694	19/55	1
12	SNP	38857625	G	[T]	0.0555556	downstream_gene_variant	C17orf78	ENSSSCG00000017696	-	0.88
12	SNP	38877354	C	[A]	0.0416667	intron_variant	TADA2A	ENSSSCG00000025775	1/15	1
12	SNP	38904897	T	[C]	0.0416667	intron_variant	TADA2A	ENSSSCG00000025775	7/15	1
12	SNP	38917281	G	[A]	0.0416667	intron_variant	TADA2A	ENSSSCG00000025775	10/15	1
12	SNP	38920203	T	[G]	0.0416667	intron_variant	TADA2A	ENSSSCG00000025775	12/15	1
12	SNP	38922102	G	[A]	0.0416667	splice_donor_variant	TADA2A	ENSSSCG00000025775	14/15	1
12	INDEL	39027764	ATCTTCTT	[ATCTT]	0.0416667	intron_variant	SYNRG	ENSSSCG00000026596	8/22	1
12	SNP	39143779	G	[A]	0.0416667	3_prime_UTR_variant	HNF1B	ENSSSCG00000022417	-	1
