# Supplementary material
Source: publisher figshare collection journal article supplement (https://plos.figshare.com/articles/dataset/_/7853096)
Supplement: Supplementary file 1 [file 1 › pgen.1008055.s026.pdf]

**Table S7: Wildtype and LA1 and recombinant haplotype in the region SSC3: 42.5-47.5.** The LA1 recessive lethal haplotype is indicated in green, while the wild-type haplotype is indicated in yellow. The Wildtype - LA1 recombinant haplotype is homozygous for the LA1 haplotype in 45.6-47.5, excluding this region to carry the causal mutation.

| Marker      | Wildtype | LA1 | Wildtype - LA1 recombinant |
|-------------|----------|-----|----------------------------|
| 42638945_GA | G        | G   | G                          |
| 42838594_AG | A        | A   | A                          |
| 43055325_AG | A        | A   | A                          |
| 43167191_AG | A        | A   | A                          |
| 43199265_GA | G        | G   | G                          |
| 43227069_AG | A        | A   | A                          |
| 43312168_AG | A        | A   | A                          |
| 43463318_AG | A        | A   | A                          |
| 43561730_AG | A        | A   | A                          |
| 44000093_AG | A        | A   | A                          |
| 44184377_GA | G        | G   | G                          |
| 44449854_GA | G        | G   | G                          |
| 44807671_AC | A        | C   | A                          |
| 44982953_CA | C        | C   | C                          |
| 45234651_GA | G        | G   | G                          |
| 45458899_AG | A        | G   | A                          |
| 45482426_GA | G        | A   | G                          |
| 45505509_GA | G        | A   | G                          |
| 45593674_AG | A        | G   | A                          |
| 45625955_GA | G        | A   | G                          |
| 45825165_AG | A        | G   | G                          |
| 45844527_GA | G        | A   | A                          |
| 45940448_AG | A        | A   | A                          |
| 46017895_GA | G        | G   | G                          |
| 46032503_AG | A        | A   | A                          |
| 46058043_GA | G        | G   | G                          |
| 46125819_AG | A        | A   | A                          |
| 46297805_AG | A        | G   | G                          |
| 46321828_AG | A        | A   | A                          |
| 46387029_AG | A        | A   | A                          |
| 46398474_AG | A        | A   | A                          |
| 46520543_AC | A        | C   | C                          |
| 46617035_CG | C        | C   | C                          |
| 46622746_AG | A        | A   | A                          |
| 46641455_AC | A        | A   | A                          |
| 46708328_AG | A        | A   | A                          |
| 46710098_AG | A        | A   | A                          |
| 46716351_AC | A        | C   | C                          |
| 46864677_GA | G        | A   | A                          |
| 46908317_AG | A        | G   | G                          |
| 46945304_AG | A        | A   | A                          |
| 46962784_GA | G        | G   | G                          |
| 46995328_GA | G        | A   | A                          |
| 47160410_CA | C        | A   | A                          |
| 47174278_GA | G        | A   | A                          |
| 47187516_AG | A        | A   | A                          |
| 47214285_AG | A        | A   | A                          |
| 47274629_AG | A        | A   | A                          |
| 47337139_GA | G        | G   | G                          |
| 47357791_GA | G        | A   | A                          |
| 47380153_GA | G        | A   | A                          |
| 47393273_CA | C        | C   | C                          |
| 47417411_AC | A        | C   | C                          |
| 47473518_CA | C        | C   | C                          |
| 47489076_GA | G        | G   | G                          |
