# Supplementary material
Source: publisher figshare collection journal article supplement (https://plos.figshare.com/articles/dataset/_/7853096)
Supplement: Supplementary file 1 [file 1 › pgen.1008055.s027.pdf]

**Table S8: Two recombinant samples used for fine-mapping of the LA1 haplotype.** The LA1 recessive lethal haplotype is indicated in green, while the wild-type haplotype is indicated in yellow. Both animals are homozygous for part of the LA1 haplotype.

| Pig ID | Haplotype 1                                            | Haplotype 2                                            |
|--------|--------------------------------------------------------|--------------------------------------------------------|
| 3582   | GAAAGAAAAAGGACGAGGAGAGAGAGAGAAACCAAAACAGAGAAAAAGAACCCG | GAAAGAAAAAGGCCGGAAGAGAAGAGAGAAACCAAAACAGAGAAAAAGAACCCG |
| 8305   | GAAAGAAAAAGGCCGGAAGAGAAGAGAGAAACCAAAACAGAGAAAAAGAACCCG | GAAAGAAAAAGGACGAGGAGGAAGAGAGAAACCAAAACAGAGAAAAAGAACCCG |
