# Supplementary material
Source: publisher figshare collection journal article supplement (https://plos.figshare.com/articles/dataset/_/7853096)
Supplement: Supplementary file 1 [file 1 › pgen.1008055.s028.xlsx]

## Sheet: LA1
Table S9: Genomic variation in high LD with the LA1 haplotype.
Chromosome	Type	Position	Ref	Alt	Allele frequency	Type	Gene symbol	Gene ID	Affected intron	Affected amino acid	SIFT score	LD (r2)
3	DELETION	38134994	N	DEL (167 bp)	0.071428	intron_variant	ADCY9	ENSSSCG00000007950	1/10	-	-	0.817105
3	SNP	43634181	T	[A]	0.068323	intergenic_variant	-	-	-	-	-	0.857441
3	SNP	43637257	G	[C]	0.068323	intergenic_variant	-	-	-	-	-	0.857441
3	SNP	43694027	T	[C]	0.068323	intergenic_variant	-	-	-	-	-	0.857441
3	SNP	43796369	A	[G]	0.068323	intergenic_variant	-	-	-	-	-	0.857441
3	SNP	43836681	T	[C]	0.068323	intergenic_variant	-	-	-	-	-	0.857441
3	INDEL	43839142	TAGCTACA	[TA]	0.068323	intergenic_variant	-	-	-	-	-	0.857441
3	SNP	43840068	G	[A]	0.068323	downstream_gene_variant	SLC20A1	ENSSSCG00000032288	-	-	-	0.857441
3	SNP	43931635	C	[T]	0.0621118	upstream_gene_variant	-	ENSSSCG00000034878	-	-	-	0.945626
3	SNP	43952776	T	[G]	0.0652174	splice_region_variant&intron_variant	POLR1B	ENSSSCG00000008098	14/14	-	-	0.901288
3	SNP	43972769	T	[G]	0.0621118	downstream_gene_variant	TTL	ENSSSCG00000008097	-	-	-	0.945626
3	SNP	44023329	T	[C]	0.0652174	upstream_gene_variant	TTL	ENSSSCG00000008097	-	-	-	0.893475
3	SNP	44032907	C	[T]	0.0652174	intergenic_variant	-	-	-	-	-	0.893475
3	SNP	44037239	A	[C]	0.0573248	intergenic_variant	-	-	-	-	-	0.88705
3	INDEL	44039274	TCT	[TT]	0.0590062	intergenic_variant	-	-	-	-	-	0.892019
3	SNP	44071627	A	[C]	0.0621118	intergenic_variant	-	-	-	-	-	0.945626
3	SNP	44076150	A	[G]	0.0621118	intergenic_variant	-	-	-	-	-	0.945626
3	SNP	44089104	G	[A]	0.0621118	intron_variant	ZC3H6	ENSSSCG00000008096	11/11	-	-	0.945626
3	SNP	44125277	C	[T]	0.0621118	intron_variant	ZC3H6	ENSSSCG00000008096	1/11	-	-	0.945626
3	SNP	44128127	A	[T]	0.0621118	intron_variant	ZC3H6	ENSSSCG00000008096	1/11	-	-	0.945626
3	SNP	44137326	G	[A]	0.065625	intron_variant	ZC3H6	ENSSSCG00000008096	1/11	-	-	0.901204
3	SNP	44146140	G	[A]	0.0621118	intron_variant	ZC3H6	ENSSSCG00000008096	1/11	-	-	0.945626
3	SNP	44153216	C	[T]	0.0652174	upstream_gene_variant	ZC3H6	ENSSSCG00000008096	-	-	-	0.901288
3	SNP	44155094	G	[A]	0.068323	intergenic_variant	-	-	-	-	-	0.857441
3	SNP	44184780	C	[T]	0.0621118	downstream_gene_variant	ZC3H8	ENSSSCG00000008099	-	-	-	0.945626
3	SNP	44200081	G	[A, T]	0.0621118	intergenic_variant	-	-	-	-	-	0.945626
3	SNP	44219132	G	[C]	0.0652174	synonymous_variant	FBLN7	ENSSSCG00000008101	-	L	-	0.901288
3	SNP	44224558	T	[C]	0.0621118	intron_variant	FBLN7	ENSSSCG00000008101	3/7	-	-	0.945626
3	SNP	44225444	C	[T]	0.0621118	intron_variant	FBLN7	ENSSSCG00000008101	3/7	-	-	0.945626
3	SNP	44230952	T	[C]	0.0590062	intron_variant	FBLN7	ENSSSCG00000008101	3/7	-	-	0.892019
3	SNP	44231786	T	[A]	0.0652174	intron_variant	FBLN7	ENSSSCG00000008101	3/7	-	-	0.901288
3	SNP	44237233	A	[C]	0.0652174	intron_variant	FBLN7	ENSSSCG00000008101	3/7	-	-	0.893475
3	INDEL	44250596	CGG	[CGGG]	0.0621118	intron_variant	FBLN7	ENSSSCG00000008101	1/7	-	-	0.945626
3	SNP	44253573	G	[A]	0.0621118	intron_variant	FBLN7	ENSSSCG00000008101	1/7	-	-	0.945626
3	SNP	44259328	C	[T]	0.0621118	intron_variant	FBLN7	ENSSSCG00000008101	1/7	-	-	0.945626
3	SNP	44259396	A	[G]	0.0590062	intron_variant	FBLN7	ENSSSCG00000008101	1/7	-	-	0.892019
3	SNP	44259882	T	[C]	0.0621118	intron_variant	FBLN7	ENSSSCG00000008101	1/7	-	-	0.945626
3	SNP	44281981	G	[A]	0.0621118	3_prime_UTR_variant	TMEM87B	ENSSSCG00000026954	-	-	-	0.945626
3	SNP	44315515	C	[T]	0.0590062	intron_variant	TMEM87B	ENSSSCG00000026954	3/18	-	-	0.892019
3	SNP	44393059	G	[A]	0.0652174	intron_variant	MERTK	ENSSSCG00000008103	8/19	-	-	0.901288
3	SNP	44407862	C	[T]	0.0590062	intron_variant	MERTK	ENSSSCG00000008103	6/19	-	-	0.892019
3	SNP	44459313	A	[G]	0.0621118	intron_variant	MERTK	ENSSSCG00000008103	1/19	-	-	0.945626
3	SNP	44492526	A	[G]	0.0621118	intergenic_variant	-	-	-	-	-	0.945626
3	SNP	44521728	A	[T]	0.0621118	intron_variant	ANAPC1	ENSSSCG00000008105	8/50	-	-	0.945626
3	SNP	44568817	A	[G]	0.0621118	intron_variant	ANAPC1	ENSSSCG00000008105	30/50	-	-	0.945626
3	SNP	44608874	T	[C]	0.0590062	downstream_gene_variant	ANAPC1	ENSSSCG00000008105	-	-	-	0.892019
3	SNP	44621710	A	[C]	0.0621118	intergenic_variant	-	-	-	-	-	0.945626
3	SNP	44655659	G	[T]	0.0621118	intergenic_variant	-	-	-	-	-	0.945626
3	SNP	44658510	G	[A]	0.0590062	intergenic_variant	-	-	-	-	-	0.892019
3	SNP	44697462	C	[T]	0.0621118	intergenic_variant	-	-	-	-	-	0.945626
3	SNP	44699666	G	[A]	0.059375	intergenic_variant	-	-	-	-	-	0.891928
3	SNP	44699908	G	[A]	0.0652174	intergenic_variant	-	-	-	-	-	0.893475
3	SNP	44713516	A	[G]	0.0621118	intergenic_variant	-	-	-	-	-	0.945626
3	SNP	44714430	T	[G]	0.0652174	intergenic_variant	-	-	-	-	-	0.893475
3	INDEL	44720899	CTGT	[CT]	0.0621118	intergenic_variant	-	-	-	-	-	0.945626
3	SNP	44723839	TG	[CT]	0.0621118	intergenic_variant	-	-	-	-	-	0.945626
3	SNP	44723865	A	[G]	0.0652174	intergenic_variant	-	-	-	-	-	0.901288
3	SNP	44723993	T	[C]	0.0621118	intergenic_variant	-	-	-	-	-	0.945626
3	SNP	44724195	G	[A]	0.0621118	intergenic_variant	-	-	-	-	-	0.945626
3	SNP	44724917	A	[G]	0.0590062	intergenic_variant	-	-	-	-	-	0.892019
3	SNP	44724942	T	[A]	0.0590062	intergenic_variant	-	-	-	-	-	0.892019
3	SNP	44728651	T	[C]	0.0621118	intergenic_variant	-	-	-	-	-	0.945626
3	SNP	44730930	C	[T]	0.0621118	intergenic_variant	-	-	-	-	-	0.945626
3	SNP	44731280	T	[C]	0.0625	intergenic_variant	-	-	-	-	-	0.945578
3	SNP	44732385	G	[A]	0.0621118	intergenic_variant	-	-	-	-	-	0.945626
3	SNP	44732669	C	[T]	0.0621118	intergenic_variant	-	-	-	-	-	0.945626
3	SNP	44733058	G	[C]	0.0590062	intergenic_variant	-	-	-	-	-	0.892019
3	SNP	44734560	T	[C]	0.0652174	intergenic_variant	-	-	-	-	-	0.893475
3	SNP	44736502	C	[G]	0.0621118	intergenic_variant	-	-	-	-	-	0.945626
3	SNP	44740222	G	[A]	0.0652174	intergenic_variant	-	-	-	-	-	0.893475
3	SNP	44742006	G	[A]	0.0652174	intergenic_variant	-	-	-	-	-	0.901288
3	SNP	44743872	T	[C]	0.0621118	intergenic_variant	-	-	-	-	-	0.945626
3	SNP	44743999	C	[A]	0.0621118	intergenic_variant	-	-	-	-	-	0.945626
3	SNP	44744102	C	[T]	0.0621118	intergenic_variant	-	-	-	-	-	0.945626
3	SNP	44744285	G	[A]	0.0621118	intergenic_variant	-	-	-	-	-	0.945626
3	SNP	44745219	T	[A]	0.0652174	intergenic_variant	-	-	-	-	-	0.893475
3	SNP	44746921	A	[T]	0.0621118	intergenic_variant	-	-	-	-	-	0.945626
3	SNP	44749205	A	[G]	0.0621118	intergenic_variant	-	-	-	-	-	0.945626
3	SNP	44749759	G	[T]	0.0621118	intergenic_variant	-	-	-	-	-	0.945626
3	SNP	44749784	C	[T]	0.0621118	intergenic_variant	-	-	-	-	-	0.945626
3	SNP	44753730	A	[G]	0.0652174	intergenic_variant	-	-	-	-	-	0.901288
3	SNP	44759646	C	[T]	0.0621118	intergenic_variant	-	-	-	-	-	0.945626
3	SNP	44770638	C	[T]	0.0652174	intergenic_variant	-	-	-	-	-	0.901288
3	INDEL	44773149	GAGAAGAA	[GAGAA]	0.0621118	intergenic_variant	-	-	-	-	-	0.945626
3	SNP	44777421	C	[T]	0.0652174	intergenic_variant	-	-	-	-	-	0.893475
3	SNP	44805829	G	[A]	0.0652174	intergenic_variant	-	-	-	-	-	0.901288
3	SNP	44806221	CT	[AC]	0.0621118	intergenic_variant	-	-	-	-	-	0.945626
3	SNP	44819637	G	[T]	0.0652174	intergenic_variant	-	-	-	-	-	0.893475
3	SNP	44837051	A	[T]	0.0621118	intron_variant&non_coding_transcript_variant	-	ENSSSCG00000035273	1/5	-	-	0.945626
3	SNP	44837310	G	[A]	0.0652174	intron_variant&non_coding_transcript_variant	-	ENSSSCG00000035273	1/5	-	-	0.893475
3	SNP	44838349	A	[T]	0.0621118	intron_variant&non_coding_transcript_variant	-	ENSSSCG00000035273	1/5	-	-	0.945626
3	SNP	44838359	G	[A]	0.0652174	intron_variant&non_coding_transcript_variant	-	ENSSSCG00000035273	1/5	-	-	0.901288
3	SNP	44838606	C	[G]	0.0621118	intron_variant&non_coding_transcript_variant	-	ENSSSCG00000035273	1/5	-	-	0.945626
3	SNP	44838688	G	[A]	0.0621118	intron_variant&non_coding_transcript_variant	-	ENSSSCG00000035273	1/5	-	-	0.945626
3	SNP	44838876	G	[A]	0.0621118	intron_variant&non_coding_transcript_variant	-	ENSSSCG00000035273	1/5	-	-	0.945626
3	SNP	44839090	A	[G]	0.0621118	intron_variant&non_coding_transcript_variant	-	ENSSSCG00000035273	1/5	-	-	0.945626
3	SNP	44839380	A	[T]	0.0621118	intron_variant&non_coding_transcript_variant	-	ENSSSCG00000035273	1/5	-	-	0.945626
3	SNP	44839900	A	[G]	0.0621118	intron_variant&non_coding_transcript_variant	-	ENSSSCG00000035273	1/5	-	-	0.945626
3	SNP	44839905	A	[G]	0.0621118	intron_variant&non_coding_transcript_variant	-	ENSSSCG00000035273	1/5	-	-	0.945626
3	SNP	44840000	C	[A]	0.0621118	intron_variant&non_coding_transcript_variant	-	ENSSSCG00000035273	1/5	-	-	0.945626
3	SNP	44840176	G	[A]	0.0652174	intron_variant&non_coding_transcript_variant	-	ENSSSCG00000035273	1/5	-	-	0.901288
3	SNP	44840467	A	[G]	0.0621118	intron_variant&non_coding_transcript_variant	-	ENSSSCG00000035273	1/5	-	-	0.945626
3	SNP	44840659	T	[G]	0.0621118	intron_variant&non_coding_transcript_variant	-	ENSSSCG00000035273	1/5	-	-	0.945626
3	SNP	44840754	C	[T]	0.0621118	intron_variant&non_coding_transcript_variant	-	ENSSSCG00000035273	1/5	-	-	0.945626
3	SNP	44840861	G	[T]	0.0652174	intron_variant&non_coding_transcript_variant	-	ENSSSCG00000035273	1/5	-	-	0.893475
3	SNP	44840889	C	[T]	0.0652174	intron_variant&non_coding_transcript_variant	-	ENSSSCG00000035273	1/5	-	-	0.893475
3	SNP	44840896	G	[A]	0.0652174	intron_variant&non_coding_transcript_variant	-	ENSSSCG00000035273	1/5	-	-	0.893475
3	SNP	44840981	T	[C]	0.0652174	intron_variant&non_coding_transcript_variant	-	ENSSSCG00000035273	1/5	-	-	0.893475
3	SNP	44841260	G	[C]	0.0621118	intron_variant&non_coding_transcript_variant	-	ENSSSCG00000035273	1/5	-	-	0.945626
3	SNP	44842114	T	[G]	0.0621118	intron_variant&non_coding_transcript_variant	-	ENSSSCG00000035273	1/5	-	-	0.945626
3	INDEL	44842207	TC	[TCAGTCC]	0.0590062	intron_variant&non_coding_transcript_variant	-	ENSSSCG00000035273	1/5	-	-	0.892019
3	SNP	44842226	T	[C]	0.0621118	intron_variant&non_coding_transcript_variant	-	ENSSSCG00000035273	1/5	-	-	0.945626
3	SNP	44842315	G	[A]	0.0621118	intron_variant&non_coding_transcript_variant	-	ENSSSCG00000035273	1/5	-	-	0.945626
3	SNP	44842449	A	[C]	0.0621118	intron_variant&non_coding_transcript_variant	-	ENSSSCG00000035273	1/5	-	-	0.945626
3	SNP	44842452	G	[A]	0.0621118	intron_variant&non_coding_transcript_variant	-	ENSSSCG00000035273	1/5	-	-	0.945626
3	SNP	44842522	G	[A]	0.0621118	intron_variant&non_coding_transcript_variant	-	ENSSSCG00000035273	1/5	-	-	0.945626
3	SNP	44842577	C	[G]	0.0621118	intron_variant&non_coding_transcript_variant	-	ENSSSCG00000035273	1/5	-	-	0.945626
3	SNP	44842871	G	[A]	0.0621118	intron_variant&non_coding_transcript_variant	-	ENSSSCG00000035273	1/5	-	-	0.945626
3	SNP	44843099	A	[C]	0.0652174	intron_variant&non_coding_transcript_variant	-	ENSSSCG00000035273	1/5	-	-	0.893475
3	SNP	44843161	CCTTTCTTTC	[CCTTTCATTC]	0.0590062	intron_variant&non_coding_transcript_variant	-	ENSSSCG00000035273	1/5	-	-	0.892019
3	SNP	44843292	G	[A]	0.0621118	intron_variant&non_coding_transcript_variant	-	ENSSSCG00000035273	1/5	-	-	0.945626
3	SNP	44843294	G	[A]	0.0621118	intron_variant&non_coding_transcript_variant	-	ENSSSCG00000035273	1/5	-	-	0.945626
3	INDEL	44843337	TT	[TCT]	0.0621118	intron_variant&non_coding_transcript_variant	-	ENSSSCG00000035273	1/5	-	-	0.945626
3	SNP	44843388	T	[C]	0.0652174	intron_variant&non_coding_transcript_variant	-	ENSSSCG00000035273	1/5	-	-	0.893475
3	SNP	44843435	T	[G]	0.0652174	intron_variant&non_coding_transcript_variant	-	ENSSSCG00000035273	1/5	-	-	0.901288
3	SNP	44843450	G	[A]	0.0652174	intron_variant&non_coding_transcript_variant	-	ENSSSCG00000035273	1/5	-	-	0.901288
3	SNP	44843458	G	[A]	0.0652174	intron_variant&non_coding_transcript_variant	-	ENSSSCG00000035273	1/5	-	-	0.901288
3	SNP	44843676	T	[G]	0.0590062	intron_variant&non_coding_transcript_variant	-	ENSSSCG00000035273	1/5	-	-	0.892019
3	SNP	44843697	G	[A]	0.0660377	intron_variant&non_coding_transcript_variant	-	ENSSSCG00000035273	1/5	-	-	0.893279
3	SNP	44844247	G	[A]	0.0621118	intron_variant&non_coding_transcript_variant	-	ENSSSCG00000035273	1/5	-	-	0.945626
3	SNP	44844307	TG	[CA]	0.0590062	intron_variant&non_coding_transcript_variant	-	ENSSSCG00000035273	1/5	-	-	0.892019
3	SNP	44844424	G	[T]	0.0621118	intron_variant&non_coding_transcript_variant	-	ENSSSCG00000035273	1/5	-	-	0.945626
3	SNP	44844527	G	[T]	0.0621118	intron_variant&non_coding_transcript_variant	-	ENSSSCG00000035273	1/5	-	-	0.945626
3	SNP	44844669	G	[A]	0.0621118	intron_variant&non_coding_transcript_variant	-	ENSSSCG00000035273	1/5	-	-	0.945626
3	SNP	44844728	T	[C]	0.0621118	intron_variant&non_coding_transcript_variant	-	ENSSSCG00000035273	1/5	-	-	0.945626
3	SNP	44844863	C	[T]	0.0621118	intron_variant&non_coding_transcript_variant	-	ENSSSCG00000035273	1/5	-	-	0.945626
3	SNP	44845332	C	[A]	0.0621118	intron_variant&non_coding_transcript_variant	-	ENSSSCG00000035273	1/5	-	-	0.945626
3	INDEL	44845410	TGG	[TG]	0.0590062	intron_variant&non_coding_transcript_variant	-	ENSSSCG00000035273	1/5	-	-	0.892019
3	SNP	44846758	C	[T]	0.068323	intron_variant&non_coding_transcript_variant	-	ENSSSCG00000035273	1/5	-	-	0.857441
3	SNP	44847393	GC	[AT]	0.0590062	intron_variant&non_coding_transcript_variant	-	ENSSSCG00000035273	1/5	-	-	0.892019
3	SNP	44849121	C	[T]	0.0621118	intron_variant&non_coding_transcript_variant	-	ENSSSCG00000035273	1/5	-	-	0.945626
3	SNP	44849128	T	[C]	0.065625	intron_variant&non_coding_transcript_variant	-	ENSSSCG00000035273	1/5	-	-	0.893378
3	SNP	44849330	A	[G]	0.0621118	intron_variant&non_coding_transcript_variant	-	ENSSSCG00000035273	1/5	-	-	0.945626
3	SNP	44849726	T	[C]	0.0652174	intron_variant&non_coding_transcript_variant	-	ENSSSCG00000035273	1/5	-	-	0.893475
3	SNP	44850110	A	[C]	0.0621118	intron_variant&non_coding_transcript_variant	-	ENSSSCG00000035273	1/5	-	-	0.945626
3	SNP	44850189	C	[G]	0.0621118	intron_variant&non_coding_transcript_variant	-	ENSSSCG00000035273	1/5	-	-	0.945626
3	SNP	44850297	A	[C]	0.0652174	intron_variant&non_coding_transcript_variant	-	ENSSSCG00000035273	1/5	-	-	0.893475
3	SNP	44850424	T	[C]	0.0621118	intron_variant&non_coding_transcript_variant	-	ENSSSCG00000035273	1/5	-	-	0.945626
3	SNP	44850482	G	[A]	0.0621118	intron_variant&non_coding_transcript_variant	-	ENSSSCG00000035273	1/5	-	-	0.945626
3	SNP	44850687	G	[A]	0.0621118	intron_variant&non_coding_transcript_variant	-	ENSSSCG00000035273	1/5	-	-	0.945626
3	SNP	44850694	G	[C]	0.0621118	intron_variant&non_coding_transcript_variant	-	ENSSSCG00000035273	1/5	-	-	0.945626
3	SNP	44852020	G	[A]	0.0621118	intron_variant&non_coding_transcript_variant	-	ENSSSCG00000035273	1/5	-	-	0.945626
3	INDEL	44852252	TG	[TGCTGTGG]	0.0621118	intron_variant&non_coding_transcript_variant	-	ENSSSCG00000035273	1/5	-	-	0.945626
3	SNP	44852310	G	[A]	0.0652174	intron_variant&non_coding_transcript_variant	-	ENSSSCG00000035273	1/5	-	-	0.901288
3	SNP	44852312	A	[T]	0.0621118	intron_variant&non_coding_transcript_variant	-	ENSSSCG00000035273	1/5	-	-	0.945626
3	SNP	44852900	C	[T]	0.0590062	intron_variant&non_coding_transcript_variant	-	ENSSSCG00000035273	1/5	-	-	0.892019
3	SNP	44853375	G	[T]	0.0621118	intron_variant&non_coding_transcript_variant	-	ENSSSCG00000035273	1/5	-	-	0.945626
3	SNP	44854733	C	[T]	0.0621118	intron_variant&non_coding_transcript_variant	-	ENSSSCG00000035273	1/5	-	-	0.945626
3	SNP	44854886	T	[C]	0.0621118	intron_variant&non_coding_transcript_variant	-	ENSSSCG00000035273	1/5	-	-	0.945626
3	SNP	44855045	C	[T]	0.0652174	intron_variant&non_coding_transcript_variant	-	ENSSSCG00000035273	1/5	-	-	0.901288
3	SNP	44855051	T	[C]	0.0652174	intron_variant&non_coding_transcript_variant	-	ENSSSCG00000035273	1/5	-	-	0.901288
3	SNP	44857108	G	[A]	0.0621118	intron_variant&non_coding_transcript_variant	-	ENSSSCG00000035273	1/5	-	-	0.945626
3	SNP	44858913	G	[A]	0.068323	intron_variant&non_coding_transcript_variant	-	ENSSSCG00000035273	1/5	-	-	0.857441
3	SNP	44858973	C	[T]	0.0652174	intron_variant&non_coding_transcript_variant	-	ENSSSCG00000035273	1/5	-	-	0.901288
3	SNP	44860882	G	[C]	0.0621118	intron_variant&non_coding_transcript_variant	-	ENSSSCG00000035273	1/5	-	-	0.945626
3	SNP	44861766	C	[T]	0.0652174	intron_variant&non_coding_transcript_variant	-	ENSSSCG00000035273	1/5	-	-	0.893475
3	SNP	44861819	T	[C]	0.0621118	intron_variant&non_coding_transcript_variant	-	ENSSSCG00000035273	1/5	-	-	0.945626
3	SNP	44862791	C	[A]	0.0621118	intron_variant&non_coding_transcript_variant	-	ENSSSCG00000035273	1/5	-	-	0.945626
3	SNP	44863196	G	[A]	0.0621118	intron_variant&non_coding_transcript_variant	-	ENSSSCG00000035273	1/5	-	-	0.945626
3	SNP	44863314	A	[G]	0.0621118	intron_variant&non_coding_transcript_variant	-	ENSSSCG00000035273	1/5	-	-	0.945626
3	SNP	44865610	A	[G]	0.0621118	intron_variant&non_coding_transcript_variant	-	ENSSSCG00000035273	1/5	-	-	0.945626
3	SNP	44866149	C	[A]	0.0652174	intron_variant&non_coding_transcript_variant	-	ENSSSCG00000035273	1/5	-	-	0.901288
3	SNP	44869671	T	[C]	0.0652174	intron_variant&non_coding_transcript_variant	-	ENSSSCG00000035273	1/5	-	-	0.893475
3	SNP	44873070	G	[A]	0.0621118	intron_variant&non_coding_transcript_variant	-	ENSSSCG00000035273	1/5	-	-	0.945626
3	SNP	44873354	G	[A]	0.0621118	intron_variant&non_coding_transcript_variant	-	ENSSSCG00000035273	1/5	-	-	0.945626
3	SNP	44874743	G	[A]	0.0621118	intron_variant&non_coding_transcript_variant	-	ENSSSCG00000035273	1/5	-	-	0.945626
3	SNP	44875030	C	[T]	0.0652174	intron_variant&non_coding_transcript_variant	-	ENSSSCG00000035273	1/5	-	-	0.893475
3	SNP	44875596	C	[T]	0.0621118	intron_variant&non_coding_transcript_variant	-	ENSSSCG00000035273	1/5	-	-	0.945626
3	SNP	44876789	G	[A]	0.0621118	intron_variant&non_coding_transcript_variant	-	ENSSSCG00000035273	1/5	-	-	0.945626
3	SNP	44877458	T	[C]	0.0652174	intron_variant&non_coding_transcript_variant	-	ENSSSCG00000035273	1/5	-	-	0.893475
3	SNP	44878992	G	[A]	0.0621118	intron_variant&non_coding_transcript_variant	-	ENSSSCG00000035273	1/5	-	-	0.945626
3	SNP	44879716	C	[A]	0.0621118	intron_variant&non_coding_transcript_variant	-	ENSSSCG00000035273	1/5	-	-	0.945626
3	SNP	44879759	G	[A]	0.0621118	intron_variant&non_coding_transcript_variant	-	ENSSSCG00000035273	1/5	-	-	0.945626
3	SNP	44881882	C	[T]	0.0621118	intron_variant&non_coding_transcript_variant	-	ENSSSCG00000035273	1/5	-	-	0.945626
3	SNP	44884684	T	[C]	0.0590062	intron_variant&non_coding_transcript_variant	-	ENSSSCG00000035273	1/5	-	-	0.892019
3	SNP	44886154	C	[T]	0.0621118	intron_variant&non_coding_transcript_variant	-	ENSSSCG00000035273	1/5	-	-	0.945626
3	SNP	44888588	G	[A]	0.0621118	intron_variant&non_coding_transcript_variant	-	ENSSSCG00000035273	1/5	-	-	0.945626
3	SNP	44889871	G	[A]	0.0621118	intron_variant&non_coding_transcript_variant	-	ENSSSCG00000035273	1/5	-	-	0.945626
3	SNP	44891498	A	[G]	0.0621118	intron_variant&non_coding_transcript_variant	-	ENSSSCG00000035273	1/5	-	-	0.945626
3	SNP	44891946	G	[A]	0.0590062	intron_variant&non_coding_transcript_variant	-	ENSSSCG00000035273	1/5	-	-	0.892019
3	SNP	44892565	C	[T]	0.0590062	intron_variant&non_coding_transcript_variant	-	ENSSSCG00000035273	1/5	-	-	0.892019
3	SNP	44892634	C	[A]	0.0621118	intron_variant&non_coding_transcript_variant	-	ENSSSCG00000035273	1/5	-	-	0.945626
3	SNP	44893906	G	[T]	0.0621118	intron_variant&non_coding_transcript_variant	-	ENSSSCG00000035273	1/5	-	-	0.945626
3	SNP	44893952	G	[A]	0.0621118	intron_variant&non_coding_transcript_variant	-	ENSSSCG00000035273	1/5	-	-	0.945626
3	SNP	44894524	G	[T]	0.0652174	intron_variant&non_coding_transcript_variant	-	ENSSSCG00000035273	1/5	-	-	0.893475
3	SNP	44895354	A	[G]	0.0621118	intron_variant&non_coding_transcript_variant	-	ENSSSCG00000035273	1/5	-	-	0.945626
3	SNP	44895745	G	[A]	0.0621118	intron_variant&non_coding_transcript_variant	-	ENSSSCG00000035273	1/5	-	-	0.945626
3	SNP	44899412	A	[G]	0.059375	intron_variant&non_coding_transcript_variant	-	ENSSSCG00000035273	1/5	-	-	0.891928
3	SNP	44903609	G	[T]	0.0652174	intron_variant&non_coding_transcript_variant	-	ENSSSCG00000035273	1/5	-	-	0.901288
3	SNP	44908424	G	[A]	0.0621118	intron_variant&non_coding_transcript_variant	-	ENSSSCG00000035273	1/5	-	-	0.945626
3	INDEL	44910361	TAA	[TA]	0.0621118	intron_variant&non_coding_transcript_variant	-	ENSSSCG00000035273	1/5	-	-	0.945626
3	SNP	44911840	A	[C]	0.0652174	intron_variant&non_coding_transcript_variant	-	ENSSSCG00000035273	1/5	-	-	0.893475
3	SNP	44960548	T	[C]	0.0621118	intron_variant&non_coding_transcript_variant	-	ENSSSCG00000035273	2/5	-	-	0.945626
3	SNP	44973690	C	[T]	0.0621118	intron_variant&non_coding_transcript_variant	-	ENSSSCG00000035273	3/5	-	-	0.945626
3	SNP	44984479	C	[T]	0.0625	intron_variant&non_coding_transcript_variant	-	ENSSSCG00000035273	4/5	-	-	0.945578
3	SNP	45004322	A	[G]	0.0652174	intron_variant&non_coding_transcript_variant	-	ENSSSCG00000035273	4/5	-	-	0.893475
3	SNP	45009029	C	[T]	0.0621118	intron_variant&non_coding_transcript_variant	-	ENSSSCG00000035273	4/5	-	-	0.945626
3	SNP	45030865	C	[T]	0.0652174	downstream_gene_variant	-	ENSSSCG00000035273	-	-	-	0.893475
3	SNP	45051295	A	[G]	0.0621118	intergenic_variant	-	-	-	-	-	0.945626
3	SNP	45065484	A	[T]	0.0621118	intergenic_variant	-	-	-	-	-	0.945626
3	SNP	45104008	A	[G]	0.0652174	intergenic_variant	-	-	-	-	-	0.901288
3	SNP	45175993	C	[T]	0.0652174	intron_variant	BCL2L11	ENSSSCG00000022322	1/2	-	-	0.893475
3	SNP	45332103	A	[G]	0.068323	intron_variant	ACOXL	ENSSSCG00000037846	12/18	-	-	0.857441
3	SNP	45419791	T	[A]	0.0652174	intron_variant	ACOXL	ENSSSCG00000037846	10/18	-	-	0.893475
3	SNP	45445724	C	[T]	0.0652174	intron_variant	ACOXL	ENSSSCG00000037846	10/18	-	-	0.893475
3	SNP	45468801	A	[G]	0.0652174	intron_variant	ACOXL	ENSSSCG00000037846	9/18	-	-	0.893475
3	SNP	45486788	T	[A]	0.0652174	intron_variant	ACOXL	ENSSSCG00000037846	8/18	-	-	0.893475
3	SNP	45507473	C	[T]	0.0652174	intron_variant	ACOXL	ENSSSCG00000037846	2/18	-	-	0.893475
3	SNP	45511182	C	[T]	0.065625	intron_variant	ACOXL	ENSSSCG00000037846	2/18	-	-	0.893378
3	INDEL	45532094	TAAA	[TA]	0.0652174	intron_variant	ACOXL	ENSSSCG00000037846	1/18	-	-	0.893475
3	SNP	45537037	G	[A]	0.0652174	intron_variant	ACOXL	ENSSSCG00000037846	1/18	-	-	0.893475
3	SNP	45560515	T	[G]	0.068323	intron_variant	ACOXL	ENSSSCG00000037846	1/18	-	-	0.857441
3	SNP	45692316	G	[A]	0.065625	intergenic_variant	-	-	-	-	-	0.893378
3	SNP	45752988	C	[T]	0.0597484	intergenic_variant	-	-	-	-	-	0.943214
3	SNP	45766530	G	[A]	0.0652174	downstream_gene_variant	ADRA2B	ENSSSCG00000008122	-	-	-	0.893475
3	SNP	45778519	A	[G]	0.0652174	intergenic_variant	-	-	-	-	-	0.893475
3	SNP	45815896	G	[A]	0.0621118	intergenic_variant	-	-	-	-	-	0.945626
3	SNP	45817394	C	[G]	0.0652174	intergenic_variant	-	-	-	-	-	0.893475
3	SNP	45820615	T	[A]	0.0652174	intergenic_variant	-	-	-	-	-	0.893475
3	SNP	45823162	C	[T]	0.068323	intergenic_variant	-	-	-	-	-	0.857441
3	SNP	45836634	G	[C]	0.0652174	intergenic_variant	-	-	-	-	-	0.893475
3	SNP	45844954	C	[T]	0.0652174	upstream_gene_variant	-	ENSSSCG00000008121	-	-	-	0.893475
3	INDEL	45845461	CCTTTC	[CC]	0.0652174	upstream_gene_variant	-	ENSSSCG00000008121	-	-	-	0.893475
3	SNP	45846231	C	[T]	0.0652174	upstream_gene_variant	-	ENSSSCG00000008121	-	-	-	0.893475
3	SNP	45846660	G	[A]	0.065625	upstream_gene_variant	-	ENSSSCG00000008121	-	-	-	0.893378
3	SNP	45847521	G	[A]	0.0652174	upstream_gene_variant	-	ENSSSCG00000008121	-	-	-	0.893475
3	SNP	45848956	G	[A]	0.0652174	intron_variant	-	ENSSSCG00000008121	3/20	-	-	0.893475
3	SNP	45849820	T	[C]	0.0652174	intron_variant	-	ENSSSCG00000008121	5/20	-	-	0.893475
3	INDEL	45851333	TCC	[TC]	0.0652174	intron_variant	-	ENSSSCG00000008121	5/20	-	-	0.893475
3	SNP	45853579	T	[G]	0.0652174	intron_variant	-	ENSSSCG00000008121	10/20	-	-	0.893475
3	SNP	45853924	C	[T]	0.0652174	intron_variant	-	ENSSSCG00000008121	11/20	-	-	0.893475
3	SNP	45854384	C	[T]	0.0652174	intron_variant	-	ENSSSCG00000008121	12/20	-	-	0.893475
3	SNP	45855115	C	[G]	0.0652174	missense_variant	-	ENSSSCG00000008121	-	Q/E	tolerated(0.23)	0.893475
3	SNP	45856529	G	[C]	0.0652174	intron_variant	-	ENSSSCG00000008121	19/20	-	-	0.893475
3	SNP	45856887	CT	[AG]	0.0652174	3_prime_UTR_variant	-	ENSSSCG00000039523	-	-	-	0.893475
3	SNP	45857000	T	[C]	0.0652174	3_prime_UTR_variant	-	ENSSSCG00000039523	-	-	-	0.893475
3	SNP	45857954	G	[C]	0.0652174	intron_variant	-	ENSSSCG00000039523	6/7	-	-	0.893475
3	SNP	45859334	C	[A]	0.0652174	intron_variant	-	ENSSSCG00000039523	4/7	-	-	0.893475
3	SNP	45859764	C	[T]	0.0652174	intron_variant	-	ENSSSCG00000039523	3/7	-	-	0.893475
3	SNP	45879558	C	[T]	0.0652174	intron_variant	-	ENSSSCG00000039523	1/7	-	-	0.893475
3	SNP	45889311	A	[T]	0.0652174	upstream_gene_variant	-	ENSSSCG00000039523	-	-	-	0.893475
3	SNP	45901394	A	[C]	0.0652174	intergenic_variant	-	-	-	-	-	0.893475
3	SNP	45901496	G	[A]	0.0652174	intergenic_variant	-	-	-	-	-	0.893475
3	SNP	45902356	T	[C]	0.0652174	downstream_gene_variant	KCNIP3	ENSSSCG00000008119	-	-	-	0.893475
3	SNP	45903767	T	[G]	0.068323	downstream_gene_variant	KCNIP3	ENSSSCG00000008119	-	-	-	0.857441
3	SNP	45903821	G	[A]	0.0652174	downstream_gene_variant	KCNIP3	ENSSSCG00000008119	-	-	-	0.893475
3	SNP	45903942	G	[A]	0.0652174	downstream_gene_variant	KCNIP3	ENSSSCG00000008119	-	-	-	0.893475
3	SNP	45904013	C	[T]	0.0652174	downstream_gene_variant	KCNIP3	ENSSSCG00000008119	-	-	-	0.893475
3	SNP	45904321	G	[A]	0.0652174	downstream_gene_variant	KCNIP3	ENSSSCG00000008119	-	-	-	0.893475
3	SNP	45904850	G	[T]	0.0652174	downstream_gene_variant	KCNIP3	ENSSSCG00000008119	-	-	-	0.893475
3	SNP	45905833	C	[A]	0.0652174	downstream_gene_variant	KCNIP3	ENSSSCG00000008119	-	-	-	0.893475
3	SNP	45906470	A	[T]	0.0652174	downstream_gene_variant	KCNIP3	ENSSSCG00000008119	-	-	-	0.893475
3	SNP	45908144	C	[T]	0.0652174	3_prime_UTR_variant	KCNIP3	ENSSSCG00000008119	-	-	-	0.893475
3	SNP	45908313	A	[C]	0.0652174	3_prime_UTR_variant	KCNIP3	ENSSSCG00000008119	-	-	-	0.893475
3	SNP	45908595	T	[C]	0.0652174	3_prime_UTR_variant	KCNIP3	ENSSSCG00000008119	-	-	-	0.893475
3	SNP	45912877	G	[A]	0.0652174	intron_variant	KCNIP3	ENSSSCG00000008119	5/8	-	-	0.893475
3	SNP	45912973	A	[G]	0.0652174	intron_variant	KCNIP3	ENSSSCG00000008119	5/8	-	-	0.893475
3	SNP	45913031	C	[T]	0.0652174	intron_variant	KCNIP3	ENSSSCG00000008119	5/8	-	-	0.893475
3	SNP	45914001	G	[A]	0.0652174	intron_variant	KCNIP3	ENSSSCG00000008119	5/8	-	-	0.893475
3	SNP	45914080	T	[C]	0.0652174	intron_variant	KCNIP3	ENSSSCG00000008119	5/8	-	-	0.893475
3	SNP	45914097	G	[A]	0.0652174	intron_variant	KCNIP3	ENSSSCG00000008119	5/8	-	-	0.893475
3	INDEL	45914129	GA	[GTA]	0.0652174	intron_variant	KCNIP3	ENSSSCG00000008119	5/8	-	-	0.893475
3	SNP	45915492	G	[C]	0.0652174	intron_variant	KCNIP3	ENSSSCG00000008119	5/8	-	-	0.893475
3	SNP	45916179	A	[T]	0.0652174	intron_variant	KCNIP3	ENSSSCG00000008119	5/8	-	-	0.893475
3	SNP	45916222	C	[G]	0.0652174	intron_variant	KCNIP3	ENSSSCG00000008119	5/8	-	-	0.893475
3	SNP	45916354	T	[C]	0.0652174	intron_variant	KCNIP3	ENSSSCG00000008119	5/8	-	-	0.893475
3	SNP	45916837	C	[A]	0.0652174	intron_variant	KCNIP3	ENSSSCG00000008119	5/8	-	-	0.893475
3	SNP	45917109	G	[C]	0.0652174	intron_variant	KCNIP3	ENSSSCG00000008119	4/8	-	-	0.893475
3	SNP	45917129	T	[G]	0.0652174	intron_variant	KCNIP3	ENSSSCG00000008119	4/8	-	-	0.893475
3	SNP	45917532	A	[C]	0.0652174	intron_variant	KCNIP3	ENSSSCG00000008119	3/8	-	-	0.893475
3	SNP	45917549	A	[C]	0.0652174	intron_variant	KCNIP3	ENSSSCG00000008119	3/8	-	-	0.893475
3	SNP	45917628	T	[C]	0.0652174	intron_variant	KCNIP3	ENSSSCG00000008119	3/8	-	-	0.893475
3	SNP	45917678	C	[A]	0.0652174	intron_variant	KCNIP3	ENSSSCG00000008119	3/8	-	-	0.893475
3	SNP	45918034	A	[C]	0.0652174	intron_variant	KCNIP3	ENSSSCG00000008119	2/8	-	-	0.893475
3	SNP	45918131	A	[G]	0.065625	intron_variant	KCNIP3	ENSSSCG00000008119	2/8	-	-	0.893378
3	SNP	45918257	A	[G]	0.068323	intron_variant	KCNIP3	ENSSSCG00000008119	2/8	-	-	0.857441
3	SNP	45918272	T	[C]	0.0652174	intron_variant	KCNIP3	ENSSSCG00000008119	2/8	-	-	0.893475
3	SNP	45918306	C	[T]	0.0652174	intron_variant	KCNIP3	ENSSSCG00000008119	2/8	-	-	0.893475
3	SNP	45918311	A	[G]	0.0652174	intron_variant	KCNIP3	ENSSSCG00000008119	2/8	-	-	0.893475
3	SNP	45918723	A	[G]	0.0652174	intron_variant	KCNIP3	ENSSSCG00000008119	2/8	-	-	0.893475
3	INDEL	45918726	ACC	[ACCC]	0.0652174	intron_variant	KCNIP3	ENSSSCG00000008119	2/8	-	-	0.893475
3	SNP	45918986	A	[C]	0.0652174	intron_variant	KCNIP3	ENSSSCG00000008119	2/8	-	-	0.893475
3	SNP	45919053	C	[A]	0.0652174	intron_variant	KCNIP3	ENSSSCG00000008119	2/8	-	-	0.893475
3	SNP	45919362	G	[A]	0.0652174	intron_variant	KCNIP3	ENSSSCG00000008119	2/8	-	-	0.893475
3	SNP	45919459	C	[T]	0.0652174	intron_variant	KCNIP3	ENSSSCG00000008119	2/8	-	-	0.893475
3	SNP	45920952	G	[A]	0.0652174	intron_variant	KCNIP3	ENSSSCG00000008119	2/8	-	-	0.893475
3	SNP	45921036	C	[T]	0.0652174	intron_variant	KCNIP3	ENSSSCG00000008119	2/8	-	-	0.893475
3	SNP	45921263	G	[A]	0.0652174	intron_variant	KCNIP3	ENSSSCG00000008119	2/8	-	-	0.893475
3	SNP	45921447	G	[A]	0.0652174	intron_variant	KCNIP3	ENSSSCG00000008119	2/8	-	-	0.893475
3	SNP	45921483	A	[G]	0.0652174	intron_variant	KCNIP3	ENSSSCG00000008119	2/8	-	-	0.893475
3	SNP	45921559	G	[A]	0.068323	intron_variant	KCNIP3	ENSSSCG00000008119	2/8	-	-	0.857441
3	SNP	45921764	A	[G]	0.0652174	intron_variant	KCNIP3	ENSSSCG00000008119	2/8	-	-	0.893475
3	SNP	45921771	A	[G]	0.0652174	intron_variant	KCNIP3	ENSSSCG00000008119	2/8	-	-	0.893475
3	SNP	45921954	A	[G]	0.068323	intron_variant	KCNIP3	ENSSSCG00000008119	2/8	-	-	0.857441
3	INDEL	45921956	AGT	[AT]	0.068323	intron_variant	KCNIP3	ENSSSCG00000008119	2/8	-	-	0.857441
3	SNP	45922009	A	[C]	0.068323	intron_variant	KCNIP3	ENSSSCG00000008119	2/8	-	-	0.857441
3	SNP	45922024	G	[A]	0.0652174	intron_variant	KCNIP3	ENSSSCG00000008119	2/8	-	-	0.893475
3	SNP	45922124	G	[T]	0.0652174	intron_variant	KCNIP3	ENSSSCG00000008119	2/8	-	-	0.893475
3	SNP	45922151	C	[T]	0.0652174	intron_variant	KCNIP3	ENSSSCG00000008119	2/8	-	-	0.893475
3	INDEL	45922388	CAA	[CAAA]	0.0652174	intron_variant	KCNIP3	ENSSSCG00000008119	2/8	-	-	0.893475
3	SNP	45922392	C	[A]	0.0652174	intron_variant	KCNIP3	ENSSSCG00000008119	2/8	-	-	0.893475
3	SNP	45922574	C	[G]	0.0652174	intron_variant	KCNIP3	ENSSSCG00000008119	2/8	-	-	0.893475
3	SNP	45922814	T	[C]	0.0652174	intron_variant	KCNIP3	ENSSSCG00000008119	2/8	-	-	0.893475
3	SNP	45924027	G	[A]	0.0652174	intron_variant	KCNIP3	ENSSSCG00000008119	2/8	-	-	0.893475
3	SNP	45924145	T	[C]	0.0652174	intron_variant	KCNIP3	ENSSSCG00000008119	2/8	-	-	0.893475
3	SNP	45924200	T	[A]	0.068323	intron_variant	KCNIP3	ENSSSCG00000008119	2/8	-	-	0.857441
3	SNP	45924443	T	[C]	0.0652174	intron_variant	KCNIP3	ENSSSCG00000008119	2/8	-	-	0.893475
3	INDEL	45924808	AGA	[AGGA]	0.0652174	intron_variant	KCNIP3	ENSSSCG00000008119	2/8	-	-	0.893475
3	INDEL	45925368	TAA	[TAAA]	0.068323	intron_variant	KCNIP3	ENSSSCG00000008119	2/8	-	-	0.857441
3	SNP	45925453	G	[A]	0.0652174	intron_variant	KCNIP3	ENSSSCG00000008119	2/8	-	-	0.893475
3	SNP	45925460	C	[T]	0.0652174	intron_variant	KCNIP3	ENSSSCG00000008119	2/8	-	-	0.893475
3	SNP	45925966	G	[A]	0.0652174	intron_variant	KCNIP3	ENSSSCG00000008119	2/8	-	-	0.893475
3	SNP	45925985	C	[T]	0.0652174	intron_variant	KCNIP3	ENSSSCG00000008119	2/8	-	-	0.893475
3	SNP	45925997	G	[A]	0.0652174	intron_variant	KCNIP3	ENSSSCG00000008119	2/8	-	-	0.893475
3	SNP	45975153	G	[A]	0.0652174	intron_variant	KCNIP3	ENSSSCG00000008119	2/8	-	-	0.893475
3	SNP	45982810	T	[C]	0.0652174	intron_variant	KCNIP3	ENSSSCG00000008119	2/8	-	-	0.893475
3	SNP	46175718	G	[C]	0.0724138	downstream_gene_variant	-	ENSSSCG00000040098	-	-	-	0.85009
3	SNP	46239344	A	[G]	0.0652174	intron_variant	-	ENSSSCG00000008115	1/3	-	-	0.893475
3	SNP	46241071	A	[C]	0.0652174	intron_variant	-	ENSSSCG00000008115	1/3	-	-	0.893475
3	SNP	46241840	G	[A]	0.068323	5_prime_UTR_variant	-	ENSSSCG00000008115	-	-	-	0.857441
3	SNP	46242205	C	[T]	0.0652174	upstream_gene_variant	-	ENSSSCG00000008115	-	-	-	0.893475
3	SNP	46242545	G	[A]	0.0621118	upstream_gene_variant	-	ENSSSCG00000008115	-	-	-	0.945626
3	SNP	46243954	A	[C]	0.068323	upstream_gene_variant	-	ENSSSCG00000008115	-	-	-	0.857441
3	SNP	46246641	G	[T]	0.0652174	upstream_gene_variant	-	ENSSSCG00000008115	-	-	-	0.893475
3	SNP	46248680	G	[A]	0.0652174	intergenic_variant	-	-	-	-	-	0.893475
3	SNP	46252088	C	[T]	0.068323	intergenic_variant		-	-	-	-	0.854175
3	SNP	46252774	G	[A]	0.068323	intergenic_variant		-	-	-	-	0.952703
3	SNP	46252813	A	[G]	0.0652174	intergenic_variant		-	-	-	-	0.901288
3	SNP	46252830	C	[T]	0.0652174	intergenic_variant		-	-	-	-	0.901288
3	SNP	46253541	T	[C]	0.0652174	intergenic_variant		-	-	-	-	0.901288
3	SNP	46254528	A	[G]	0.0652174	intergenic_variant		-	-	-	-	0.901288
3	SNP	46255688	C	[T]	0.0714286	intergenic_variant		-	-	-	-	0.917847
3	SNP	46255810	C	[T]	0.0621118	intergenic_variant		-	-	-	-	0.953112
3	SNP	46257617	A	[G]	0.0652174	intergenic_variant		-	-	-	-	0.901288
3	SNP	46258644	C	[T]	0.068323	intergenic_variant		-	-	-	-	0.854175
3	SNP	46259409	T	[C]	0.0652174	intergenic_variant		-	-	-	-	0.901288
3	SNP	46260961	G	[A]	0.0621118	intergenic_variant		-	-	-	-	0.852281
3	SNP	46261088	C	[A]	0.068323	intergenic_variant		-	-	-	-	0.854175
3	SNP	46262274	T	[C]	0.0652174	intergenic_variant		-	-	-	-	0.901288
3	SNP	46263060	G	[A]	0.0652174	intergenic_variant		-	-	-	-	0.901288
3	SNP	46263368	G	[A]	0.0652174	intergenic_variant		-	-	-	-	0.901288
3	SNP	46265933	G	[T]	0.068323	intergenic_variant		-	-	-	-	0.854175
3	SNP	46266079	A	[G]	0.068323	intergenic_variant		-	-	-	-	0.860401
3	SNP	46270978	T	[G]	0.0621118	intergenic_variant		-	-	-	-	0.852281
3	SNP	46279052	C	[T]	0.0652174	upstream_gene_variant		ENSSSCG00000034826	-	-	-	0.901288
3	SNP	46279569	C	[T]	0.0652174	upstream_gene_variant		ENSSSCG00000034826	-	-	-	0.901288
3	SNP	46281143	C	[T]	0.0621118	3_prime_UTR_variant	MALL	ENSSSCG00000025021	-	-	-	0.852281
3	INDEL	46284492	TCTGAC	[TC]	0.0652174	intron_variant		ENSSSCG00000034826	1/1	-	-	0.901288
3	SNP	46284516	C	[G]	0.0652174	intron_variant	-	ENSSSCG00000034826	1/1	-	-	0.893475
3	SNP	46284679	C	[T]	0.0652174	intron_variant	-	ENSSSCG00000034826	1/1	-	-	0.893475
3	SNP	46285775	T	[C]	0.0652174	intron_variant	-	ENSSSCG00000034826	1/1	-	-	0.893475
3	SNP	46287044	G	[A]	0.0652174	splice_region_variant&intron_variant	MALL	ENSSSCG00000025021	3/4	-	-	0.893475
3	SNP	46287606	C	[T]	0.0652174	intron_variant	-	ENSSSCG00000034826	1/1	-	-	0.893475
3	SNP	46287864	T	[C]	0.068323	intron_variant		ENSSSCG00000034826	1/1	-	-	0.854175
3	SNP	46288267	C	[T]	0.068323	intron_variant		ENSSSCG00000034826	1/1	-	-	0.854175
3	SNP	46288308	A	[G]	0.068323	intron_variant		ENSSSCG00000034826	1/1	-	-	0.854175
3	SNP	46289305	G	[A]	0.0652174	intron_variant	-	ENSSSCG00000034826	1/1	-	-	0.893475
3	SNP	46292248	G	[A]	0.0652174	intron_variant	-	ENSSSCG00000034826	1/1	-	-	0.893475
3	SNP	46292653	G	[A]	0.0652174	intron_variant	-	ENSSSCG00000034826	1/1	-	-	0.893475
3	SNP	46292934	C	[T]	0.0652174	intron_variant	-	ENSSSCG00000034826	1/1	-	-	0.893475
3	SNP	46292942	A	[G]	0.0652174	intron_variant	-	ENSSSCG00000034826	1/1	-	-	0.893475
3	SNP	46294314	A	[G]	0.068323	intron_variant	-	ENSSSCG00000034826	1/1	-	-	0.857441
3	SNP	46295115	G	[A]	0.0652174	intron_variant	-	ENSSSCG00000034826	1/1	-	-	0.893475
3	SNP	46295557	T	[G]	0.0652174	intron_variant	-	ENSSSCG00000034826	1/1	-	-	0.893475
3	SNP	46295574	A	[T]	0.0652174	intron_variant	-	ENSSSCG00000034826	1/1	-	-	0.893475
3	SNP	46295866	A	[G]	0.068323	intron_variant	-	ENSSSCG00000034826	1/1	-	-	0.857441
3	SNP	46296049	C	[T]	0.0652174	intron_variant	-	ENSSSCG00000034826	1/1	-	-	0.893475
3	SNP	46296369	C	[T]	0.0652174	intron_variant	-	ENSSSCG00000034826	1/1	-	-	0.893475
3	SNP	46297815	G	[C]	0.068323	intron_variant		ENSSSCG00000034826	1/1	-	-	0.854175
3	SNP	46299769	T	[C]	0.0652174	intron_variant		ENSSSCG00000034826	1/1	-	-	0.901288
3	SNP	46300064	C	[T]	0.068323	intron_variant		ENSSSCG00000034826	1/1	-	-	0.854175
3	SNP	46300692	C	[T]	0.0652174	intron_variant		ENSSSCG00000034826	1/1	-	-	0.901288
3	SNP	46304298	T	[A]	0.0652174	intron_variant		ENSSSCG00000034826	1/1	-	-	0.901288
3	SNP	46305897	C	[T]	0.0652174	intron_variant		ENSSSCG00000034826	1/1	-	-	0.901288
3	SNP	46311846	T	[C]	0.0652174	intron_variant		ENSSSCG00000034826	1/1	-	-	0.901288
3	SNP	46312455	A	[T]	0.068323	intron_variant		ENSSSCG00000034826	1/1	-	-	0.860401
3	SNP	46315858	G	[A]	0.0621118	intron_variant		ENSSSCG00000034826	1/1	-	-	0.852281
3	SNP	46332011	T	[C]	0.0652174	intron_variant	NPHP1	ENSSSCG00000008111	16/19	-	-	0.901288
3	SNP	46335363	C	[T]	0.0652174	intron_variant	NPHP1	ENSSSCG00000008111	14/19	-	-	0.901288
3	SNP	46342985	T	[C]	0.0714286	intron_variant	NPHP1	ENSSSCG00000008111	11/19	-	-	0.917847
3	SNP	46366078	G	[A]	0.0652174	intron_variant	NPHP1	ENSSSCG00000008111	2/19	-	-	0.901288
3	SNP	46416229	T	[C]	0.0652174	intron_variant		ENSSSCG00000034826	1/1	-	-	0.901288
3	SNP	46420028	C	[T]	0.068323	intron_variant		ENSSSCG00000034826	1/1	-	-	0.854175
3	SNP	46424311	T	[C]	0.0652174	intron_variant		ENSSSCG00000034826	1/1	-	-	0.901288
3	SNP	46424513	A	[C]	0.0652174	intron_variant		ENSSSCG00000034826	1/1	-	-	0.901288
3	SNP	46425316	T	[C]	0.065625	intron_variant		ENSSSCG00000034826	1/1	-	-	0.855321
3	SNP	46425832	T	[C]	0.0652174	intron_variant	-	ENSSSCG00000034826	1/1	-	-	0.893475
3	SNP	46427492	C	[T]	0.0652174	intron_variant	-	ENSSSCG00000034826	1/1	-	-	0.893475
3	SNP	46429531	G	[A]	0.0652174	missense_variant	-	ENSSSCG00000034826	-	E/K	tolerated(1)	0.893475
3	SNP	46431660	G	[A]	0.0621118	downstream_gene_variant		ENSSSCG00000034826	-	-	-	0.852281
3	SNP	46456141	A	[G]	0.068323	intergenic_variant		-	-	-	-	0.854175
3	SNP	46508653	A	[C]	0.0652174	intron_variant	SEPT10	ENSSSCG00000023050	4/10	-	-	0.901288
3	SNP	46600236	G	[A]	0.0621118	intergenic_variant		-	-	-	-	0.953112
3	SNP	46611285	G	[A]	0.0652174	intergenic_variant		-	-	-	-	0.901288
3	SNP	46619430	G	[C]	0.0652174	intergenic_variant		-	-	-	-	0.901288
3	INDEL	46652229	ATTTTTTC	[ATTTTTTTC]	0.0652174	intergenic_variant	-	-	-	-	-	0.893475
3	SNP	46755429	T	[G]	0.0652174	downstream_gene_variant	NEURL3	ENSSSCG00000008124	-	-	-	0.901288
3	SNP	46785129	G	[A]	0.0652174	intergenic_variant		-	-	-	-	0.901288
3	SNP	46806382	A	[G]	0.0652174	upstream_gene_variant	U6	ENSSSCG00000018129	-	-	-	0.901288
3	SNP	46836997	A	[G]	0.068323	intergenic_variant		-	-	-	-	0.854175
3	SNP	46844608	G	[A]	0.0652174	downstream_gene_variant	NCAPH	ENSSSCG00000008125	-	-	-	0.901288
3	SNP	46847138	A	[T]	0.068323	downstream_gene_variant	NCAPH	ENSSSCG00000008125	-	-	-	0.854175
3	SNP	46991120	C	[G]	0.0652174	intron_variant	TMEM127	ENSSSCG00000034105	4/10	-	-	0.901288
3	SNP	46992775	C	[T]	0.0652174	5_prime_UTR_variant	STARD7	ENSSSCG00000008132	-	-	-	0.901288
3	SNP	47033494	C	[T]	0.068323	intergenic_variant		-	-	-	-	0.860401
3	SNP	47039406	C	[T]	0.0652174	intergenic_variant		-	-	-	-	0.901288
