# Supplementary material
Source: publisher figshare collection journal article supplement (https://plos.figshare.com/articles/dataset/_/7853096)
Supplement: Supplementary file 1 [file 1 › pgen.1008055.s029.xlsx]

## Sheet: LA2
Table S10: Genomic variation in high LD with the LA2 haplotype.
Chromosome	Type	Position	Ref	Alt	Allele frequency	Type	Gene symbol	Gene ID	Affected intron	Affected amino acid	SIFT score	LD (r2)
13	INDEL	195977037	ACG	[AG]	0.0496894	frameshift_variant	URB1	ENSSSCG00000032024	-	TV/TX	-	0.817601
13	SNP	197331334	C	[T]	0.0403727	intron_variant	ITSN1	ENSSSCG00000024614	4/34	-	-	0.854955
13	SNP	197349327	C	[T]	0.0403727	intron_variant	ITSN1	ENSSSCG00000024614	6/34	-	-	0.854955
13	SNP	197351109	T	[C]	0.0434783	intron_variant	ITSN1	ENSSSCG00000024614	7/34	-	-	0.801569
13	INDEL	197359863	AA	[AAAGA]	0.0403727	intron_variant	ITSN1	ENSSSCG00000024614	8/34	-	-	0.854955
13	SNP	197360273	G	[A]	0.0403727	intron_variant	ITSN1	ENSSSCG00000024614	8/34	-	-	0.854955
13	SNP	197361412	G	[A]	0.0403727	intron_variant	ITSN1	ENSSSCG00000024614	9/34	-	-	0.854955
13	SNP	197361437	G	[C]	0.0403727	intron_variant	ITSN1	ENSSSCG00000024614	9/34	-	-	0.854955
13	SNP	197361470	A	[G]	0.0403727	intron_variant	ITSN1	ENSSSCG00000024614	9/34	-	-	0.854955
13	SNP	197361473	T	[C]	0.0403727	intron_variant	ITSN1	ENSSSCG00000024614	9/34	-	-	0.854955
13	SNP	197362190	G	[A]	0.0403727	intron_variant	ITSN1	ENSSSCG00000024614	9/34	-	-	0.854955
13	SNP	197362275	T	[G]	0.0403727	intron_variant	ITSN1	ENSSSCG00000024614	9/34	-	-	0.854955
13	SNP	197362355	A	[G]	0.0403727	intron_variant	ITSN1	ENSSSCG00000024614	9/34	-	-	0.854955
13	SNP	197362414	T	[A]	0.0403727	intron_variant	ITSN1	ENSSSCG00000024614	9/34	-	-	0.854955
13	SNP	197362425	A	[C]	0.0403727	intron_variant	ITSN1	ENSSSCG00000024614	9/34	-	-	0.854955
13	SNP	197376088	G	[A]	0.0403727	intron_variant	ITSN1	ENSSSCG00000024614	14/34	-	-	0.854955
13	SNP	197383808	G	[A]	0.0403727	intron_variant	ITSN1	ENSSSCG00000024614	16/34	-	-	0.854955
13	SNP	197388068	G	[A]	0.04375	intron_variant	ITSN1	ENSSSCG00000024614	16/34	-	-	0.801466
13	SNP	197388715	G	[A]	0.0403727	intron_variant	ITSN1	ENSSSCG00000024614	16/34	-	-	0.854955
13	SNP	197388729	A	[C]	0.0403727	intron_variant	ITSN1	ENSSSCG00000024614	16/34	-	-	0.854955
13	SNP	197388867	C	[T]	0.0403727	intron_variant	ITSN1	ENSSSCG00000024614	16/34	-	-	0.854955
13	SNP	197389218	G	[A]	0.0403727	intron_variant	ITSN1	ENSSSCG00000024614	16/34	-	-	0.854955
13	SNP	197389315	A	[T]	0.0403727	intron_variant	ITSN1	ENSSSCG00000024614	16/34	-	-	0.854955
13	SNP	197389459	T	[A]	0.0403727	intron_variant	ITSN1	ENSSSCG00000024614	16/34	-	-	0.854955
13	SNP	197389994	G	[A]	0.0403727	intron_variant	ITSN1	ENSSSCG00000024614	16/34	-	-	0.854955
13	SNP	197390412	A	[G]	0.0403727	intron_variant	ITSN1	ENSSSCG00000024614	16/34	-	-	0.854955
13	SNP	197390467	C	[A]	0.0465838	intron_variant	ITSN1	ENSSSCG00000024614	16/34	-	-	0.858373
13	SNP	197391078	GG	[AA]	0.0403727	intron_variant	ITSN1	ENSSSCG00000024614	16/34	-	-	0.854955
13	SNP	197391104	A	[G]	0.0403727	intron_variant	ITSN1	ENSSSCG00000024614	16/34	-	-	0.854955
13	SNP	197391331	T	[C]	0.0403727	intron_variant	ITSN1	ENSSSCG00000024614	16/34	-	-	0.854955
13	SNP	197391434	G	[A]	0.0403727	intron_variant	ITSN1	ENSSSCG00000024614	16/34	-	-	0.854955
13	SNP	197391476	C	[T]	0.0403727	intron_variant	ITSN1	ENSSSCG00000024614	16/34	-	-	0.854955
13	SNP	197391526	T	[G]	0.0403727	intron_variant	ITSN1	ENSSSCG00000024614	16/34	-	-	0.854955
13	SNP	197391540	G	[A]	0.0403727	intron_variant	ITSN1	ENSSSCG00000024614	16/34	-	-	0.854955
13	SNP	197391653	A	[G]	0.0403727	intron_variant	ITSN1	ENSSSCG00000024614	16/34	-	-	0.854955
13	SNP	197391655	G	[A]	0.0403727	intron_variant	ITSN1	ENSSSCG00000024614	16/34	-	-	0.854955
13	SNP	197391691	G	[A]	0.0403727	intron_variant	ITSN1	ENSSSCG00000024614	16/34	-	-	0.854955
13	SNP	197391955	A	[G]	0.0403727	intron_variant	ITSN1	ENSSSCG00000024614	16/34	-	-	0.854955
13	SNP	197392020	G	[C]	0.0403727	intron_variant	ITSN1	ENSSSCG00000024614	16/34	-	-	0.854955
13	SNP	197392076	G	[A]	0.0403727	intron_variant	ITSN1	ENSSSCG00000024614	16/34	-	-	0.854955
13	SNP	197392189	G	[A]	0.0403727	intron_variant	ITSN1	ENSSSCG00000024614	16/34	-	-	0.854955
13	SNP	197392197	A	[G]	0.0403727	intron_variant	ITSN1	ENSSSCG00000024614	16/34	-	-	0.854955
13	SNP	197392202	G	[A]	0.0403727	intron_variant	ITSN1	ENSSSCG00000024614	16/34	-	-	0.854955
13	SNP	197392283	C	[T]	0.0403727	intron_variant	ITSN1	ENSSSCG00000024614	16/34	-	-	0.854955
13	SNP	197392510	C	[T]	0.0403727	intron_variant	ITSN1	ENSSSCG00000024614	16/34	-	-	0.854955
13	SNP	197392604	C	[T]	0.0403727	intron_variant	ITSN1	ENSSSCG00000024614	16/34	-	-	0.854955
13	SNP	197392611	C	[T]	0.0403727	intron_variant	ITSN1	ENSSSCG00000024614	16/34	-	-	0.854955
13	SNP	197392618	G	[A]	0.0403727	intron_variant	ITSN1	ENSSSCG00000024614	16/34	-	-	0.854955
13	SNP	197392637	C	[G]	0.0403727	intron_variant	ITSN1	ENSSSCG00000024614	16/34	-	-	0.854955
13	SNP	197392737	G	[A]	0.0403727	intron_variant	ITSN1	ENSSSCG00000024614	16/34	-	-	0.854955
13	INDEL	197392780	CAGA	[CA]	0.0403727	intron_variant	ITSN1	ENSSSCG00000024614	16/34	-	-	0.854955
13	SNP	197392826	A	[T]	0.0403727	intron_variant	ITSN1	ENSSSCG00000024614	16/34	-	-	0.854955
13	SNP	197392884	A	[G]	0.0403727	intron_variant	ITSN1	ENSSSCG00000024614	16/34	-	-	0.854955
13	SNP	197392951	A	[G]	0.0403727	intron_variant	ITSN1	ENSSSCG00000024614	16/34	-	-	0.854955
13	SNP	197392968	T	[C]	0.0403727	intron_variant	ITSN1	ENSSSCG00000024614	16/34	-	-	0.854955
13	SNP	197393149	G	[A]	0.0403727	intron_variant	ITSN1	ENSSSCG00000024614	16/34	-	-	0.854955
13	SNP	197393163	TG	[CA]	0.0403727	intron_variant	ITSN1	ENSSSCG00000024614	16/34	-	-	0.854955
13	SNP	197393179	G	[A]	0.0403727	intron_variant	ITSN1	ENSSSCG00000024614	16/34	-	-	0.854955
13	SNP	197393320	G	[A]	0.0403727	intron_variant	ITSN1	ENSSSCG00000024614	16/34	-	-	0.854955
13	SNP	197393344	G	[A]	0.0403727	intron_variant	ITSN1	ENSSSCG00000024614	16/34	-	-	0.854955
13	SNP	197393378	A	[G]	0.0403727	intron_variant	ITSN1	ENSSSCG00000024614	16/34	-	-	0.854955
13	SNP	197393385	T	[C]	0.0403727	intron_variant	ITSN1	ENSSSCG00000024614	16/34	-	-	0.854955
13	SNP	197393445	A	[T]	0.0403727	intron_variant	ITSN1	ENSSSCG00000024614	16/34	-	-	0.854955
13	SNP	197393452	C	[T]	0.0403727	intron_variant	ITSN1	ENSSSCG00000024614	16/34	-	-	0.854955
13	INDEL	197393466	AGTG	[AGTGTG]	0.0403727	intron_variant	ITSN1	ENSSSCG00000024614	16/34	-	-	0.854955
13	SNP	197393508	A	[G]	0.0403727	intron_variant	ITSN1	ENSSSCG00000024614	16/34	-	-	0.854955
13	SNP	197393515	T	[C]	0.0403727	intron_variant	ITSN1	ENSSSCG00000024614	16/34	-	-	0.854955
13	SNP	197393548	TC	[CT]	0.0403727	intron_variant	ITSN1	ENSSSCG00000024614	16/34	-	-	0.854955
13	SNP	197393587	C	[T]	0.0403727	intron_variant	ITSN1	ENSSSCG00000024614	16/34	-	-	0.854955
13	SNP	197393675	A	[T]	0.0403727	intron_variant	ITSN1	ENSSSCG00000024614	16/34	-	-	0.854955
13	SNP	197393701	C	[T]	0.0403727	intron_variant	ITSN1	ENSSSCG00000024614	16/34	-	-	0.854955
13	SNP	197393809	T	[C]	0.0403727	intron_variant	ITSN1	ENSSSCG00000024614	16/34	-	-	0.854955
13	SNP	197393819	G	[A]	0.0403727	intron_variant	ITSN1	ENSSSCG00000024614	16/34	-	-	0.854955
13	SNP	197393834	G	[A]	0.0403727	intron_variant	ITSN1	ENSSSCG00000024614	16/34	-	-	0.854955
13	SNP	197394093	C	[T]	0.0403727	intron_variant	ITSN1	ENSSSCG00000024614	16/34	-	-	0.854955
13	SNP	197394348	C	[T]	0.0403727	intron_variant	ITSN1	ENSSSCG00000024614	16/34	-	-	0.854955
13	SNP	197394363	C	[G]	0.0403727	intron_variant	ITSN1	ENSSSCG00000024614	16/34	-	-	0.854955
13	SNP	197394479	C	[T]	0.0434783	intron_variant	ITSN1	ENSSSCG00000024614	16/34	-	-	0.801569
13	SNP	197394538	C	[T]	0.0403727	intron_variant	ITSN1	ENSSSCG00000024614	16/34	-	-	0.854955
13	SNP	197394993	A	[G]	0.0403727	intron_variant	ITSN1	ENSSSCG00000024614	16/34	-	-	0.854955
13	SNP	197395008	G	[A]	0.0403727	intron_variant	ITSN1	ENSSSCG00000024614	16/34	-	-	0.854955
13	SNP	197395022	G	[T]	0.0403727	intron_variant	ITSN1	ENSSSCG00000024614	16/34	-	-	0.854955
13	SNP	197395066	C	[T]	0.0403727	intron_variant	ITSN1	ENSSSCG00000024614	16/34	-	-	0.854955
13	SNP	197395074	C	[T]	0.0403727	intron_variant	ITSN1	ENSSSCG00000024614	16/34	-	-	0.854955
13	SNP	197395084	G	[A]	0.0403727	intron_variant	ITSN1	ENSSSCG00000024614	16/34	-	-	0.854955
13	SNP	197395154	T	[C]	0.0403727	intron_variant	ITSN1	ENSSSCG00000024614	16/34	-	-	0.854955
13	SNP	197395167	G	[A]	0.0403727	intron_variant	ITSN1	ENSSSCG00000024614	16/34	-	-	0.854955
13	SNP	197395234	G	[A]	0.0403727	intron_variant	ITSN1	ENSSSCG00000024614	16/34	-	-	0.854955
13	SNP	197395237	A	[T]	0.0403727	intron_variant	ITSN1	ENSSSCG00000024614	16/34	-	-	0.854955
13	SNP	197395239	A	[G]	0.0403727	intron_variant	ITSN1	ENSSSCG00000024614	16/34	-	-	0.854955
13	SNP	197395268	A	[C]	0.0403727	intron_variant	ITSN1	ENSSSCG00000024614	16/34	-	-	0.854955
13	SNP	197395366	A	[G]	0.040625	intron_variant	ITSN1	ENSSSCG00000024614	16/34	-	-	0.854875
13	SNP	197395454	C	[T]	0.040625	intron_variant	ITSN1	ENSSSCG00000024614	16/34	-	-	0.854875
13	SNP	197395473	A	[G]	0.040625	intron_variant	ITSN1	ENSSSCG00000024614	16/34	-	-	0.854875
13	SNP	197395599	C	[T]	0.0403727	intron_variant	ITSN1	ENSSSCG00000024614	16/34	-	-	0.854955
13	SNP	197395611	G	[C]	0.0403727	intron_variant	ITSN1	ENSSSCG00000024614	16/34	-	-	0.854955
13	SNP	197395697	G	[A]	0.0408805	intron_variant	ITSN1	ENSSSCG00000024614	16/34	-	-	0.854795
13	SNP	197396089	T	[C]	0.0403727	intron_variant	ITSN1	ENSSSCG00000024614	16/34	-	-	0.854955
13	INDEL	197396665	TCCTTAAC	[TC]	0.0403727	intron_variant	ITSN1	ENSSSCG00000024614	16/34	-	-	0.854955
13	SNP	197396678	C	[A]	0.0403727	intron_variant	ITSN1	ENSSSCG00000024614	16/34	-	-	0.854955
13	SNP	197397083	A	[G]	0.0403727	intron_variant	ITSN1	ENSSSCG00000024614	16/34	-	-	0.854955
13	SNP	197397100	C	[T]	0.0403727	intron_variant	ITSN1	ENSSSCG00000024614	16/34	-	-	0.854955
13	SNP	197397198	A	[G]	0.0403727	synonymous_variant	ITSN1	ENSSSCG00000024614	-	E	-	0.854955
13	SNP	197397328	G	[A]	0.0403727	intron_variant	ITSN1	ENSSSCG00000024614	17/34	-	-	0.854955
13	INDEL	197397644	CAA	[CAAA]	0.0403727	intron_variant	ITSN1	ENSSSCG00000024614	17/34	-	-	0.854955
13	SNP	197397692	A	[G]	0.0403727	intron_variant	ITSN1	ENSSSCG00000024614	17/34	-	-	0.854955
13	SNP	197397871	A	[G]	0.0403727	intron_variant	ITSN1	ENSSSCG00000024614	17/34	-	-	0.854955
13	SNP	197397934	A	[G]	0.0403727	intron_variant	ITSN1	ENSSSCG00000024614	17/34	-	-	0.854955
13	SNP	197398430	A	[G]	0.0403727	intron_variant	ITSN1	ENSSSCG00000024614	17/34	-	-	0.854955
13	SNP	197398478	G	[A]	0.0403727	intron_variant	ITSN1	ENSSSCG00000024614	17/34	-	-	0.854955
13	SNP	197398482	C	[T]	0.0403727	intron_variant	ITSN1	ENSSSCG00000024614	17/34	-	-	0.854955
13	SNP	197398869	T	[C]	0.0403727	intron_variant	ITSN1	ENSSSCG00000024614	17/34	-	-	0.854955
13	SNP	197398879	T	[C]	0.0403727	intron_variant	ITSN1	ENSSSCG00000024614	17/34	-	-	0.854955
13	SNP	197399105	G	[A]	0.0403727	intron_variant	ITSN1	ENSSSCG00000024614	17/34	-	-	0.854955
13	SNP	197399175	T	[C]	0.040625	intron_variant	ITSN1	ENSSSCG00000024614	17/34	-	-	0.854875
13	SNP	197399231	G	[T]	0.0403727	intron_variant	ITSN1	ENSSSCG00000024614	17/34	-	-	0.854955
13	SNP	197399250	C	[A]	0.0403727	intron_variant	ITSN1	ENSSSCG00000024614	17/34	-	-	0.854955
13	INDEL	197399470	AT	[ACG]	0.0403727	intron_variant	ITSN1	ENSSSCG00000024614	17/34	-	-	0.854955
13	SNP	197399496	C	[T]	0.0403727	intron_variant	ITSN1	ENSSSCG00000024614	17/34	-	-	0.854955
13	SNP	197399539	C	[T]	0.0403727	intron_variant	ITSN1	ENSSSCG00000024614	17/34	-	-	0.854955
13	SNP	197399615	C	[A]	0.0403727	intron_variant	ITSN1	ENSSSCG00000024614	17/34	-	-	0.854955
13	SNP	197399664	C	[A]	0.0403727	intron_variant	ITSN1	ENSSSCG00000024614	17/34	-	-	0.854955
13	SNP	197399762	A	[G]	0.0403727	intron_variant	ITSN1	ENSSSCG00000024614	17/34	-	-	0.854955
13	SNP	197400068	G	[A]	0.0434783	intron_variant	ITSN1	ENSSSCG00000024614	17/34	-	-	0.926984
13	SNP	197400544	C	[T]	0.0403727	intron_variant	ITSN1	ENSSSCG00000024614	17/34	-	-	0.854955
13	SNP	197400608	A	[G]	0.0403727	intron_variant	ITSN1	ENSSSCG00000024614	17/34	-	-	0.854955
13	SNP	197400705	G	[A]	0.0403727	intron_variant	ITSN1	ENSSSCG00000024614	17/34	-	-	0.854955
13	SNP	197400708	C	[T]	0.0403727	intron_variant	ITSN1	ENSSSCG00000024614	17/34	-	-	0.854955
13	SNP	197400738	C	[T]	0.0403727	intron_variant	ITSN1	ENSSSCG00000024614	17/34	-	-	0.854955
13	SNP	197400799	A	[T]	0.0403727	intron_variant	ITSN1	ENSSSCG00000024614	17/34	-	-	0.854955
13	SNP	197400853	T	[C]	0.0403727	intron_variant	ITSN1	ENSSSCG00000024614	17/34	-	-	0.854955
13	SNP	197400880	A	[G]	0.0403727	intron_variant	ITSN1	ENSSSCG00000024614	17/34	-	-	0.854955
13	SNP	197400934	G	[A]	0.0403727	intron_variant	ITSN1	ENSSSCG00000024614	17/34	-	-	0.854955
13	SNP	197401004	G	[A]	0.0403727	intron_variant	ITSN1	ENSSSCG00000024614	17/34	-	-	0.854955
13	SNP	197401195	A	[G]	0.0403727	intron_variant	ITSN1	ENSSSCG00000024614	17/34	-	-	0.854955
13	SNP	197401322	C	[T]	0.0403727	intron_variant	ITSN1	ENSSSCG00000024614	17/34	-	-	0.854955
13	SNP	197401718	G	[C]	0.0403727	missense_variant	ITSN1	ENSSSCG00000024614	-	A/P	tolerated(0.31)	0.854955
13	SNP	197401954	A	[C]	0.0403727	intron_variant	ITSN1	ENSSSCG00000024614	18/34	-	-	0.854955
13	SNP	197401982	C	[G]	0.0403727	intron_variant	ITSN1	ENSSSCG00000024614	18/34	-	-	0.854955
13	SNP	197401986	G	[C]	0.0403727	intron_variant	ITSN1	ENSSSCG00000024614	18/34	-	-	0.854955
13	SNP	197401993	G	[A]	0.0403727	intron_variant	ITSN1	ENSSSCG00000024614	18/34	-	-	0.854955
13	SNP	197402005	G	[T]	0.0403727	intron_variant	ITSN1	ENSSSCG00000024614	18/34	-	-	0.854955
13	SNP	197402067	A	[T]	0.0434783	intron_variant	ITSN1	ENSSSCG00000024614	18/34	-	-	0.801569
13	SNP	197402142	A	[G]	0.0403727	intron_variant	ITSN1	ENSSSCG00000024614	18/34	-	-	0.854955
13	SNP	197402314	AA	[CT]	0.0403727	intron_variant	ITSN1	ENSSSCG00000024614	18/34	-	-	0.854955
13	SNP	197402376	G	[T]	0.0403727	intron_variant	ITSN1	ENSSSCG00000024614	18/34	-	-	0.854955
13	SNP	197402414	C	[T]	0.0403727	intron_variant	ITSN1	ENSSSCG00000024614	18/34	-	-	0.854955
13	INDEL	197402433	GATA	[GA]	0.0403727	intron_variant	ITSN1	ENSSSCG00000024614	18/34	-	-	0.854955
13	SNP	197403702	A	[G]	0.0434783	intron_variant	ITSN1	ENSSSCG00000024614	18/34	-	-	0.801569
13	SNP	197403837	C	[T]	0.0403727	intron_variant	ITSN1	ENSSSCG00000024614	18/34	-	-	0.854955
13	SNP	197406037	T	[C]	0.0403727	intron_variant	ITSN1	ENSSSCG00000024614	19/34	-	-	0.854955
13	SNP	197406132	G	[A]	0.0403727	intron_variant	ITSN1	ENSSSCG00000024614	19/34	-	-	0.854955
13	SNP	197406165	C	[T]	0.0403727	intron_variant	ITSN1	ENSSSCG00000024614	19/34	-	-	0.854955
13	SNP	197406183	G	[A]	0.0403727	intron_variant	ITSN1	ENSSSCG00000024614	19/34	-	-	0.854955
13	SNP	197406324	A	[T]	0.0403727	intron_variant	ITSN1	ENSSSCG00000024614	20/34	-	-	0.854955
13	INDEL	197406376	AA	[ACCA]	0.0403727	intron_variant	ITSN1	ENSSSCG00000024614	20/34	-	-	0.854955
13	SNP	197406445	A	[G]	0.0403727	intron_variant	ITSN1	ENSSSCG00000024614	20/34	-	-	0.854955
13	SNP	197406532	CA	[TG]	0.0403727	intron_variant	ITSN1	ENSSSCG00000024614	20/34	-	-	0.854955
13	INDEL	197407190	TGG	[TG]	0.0403727	intron_variant	ITSN1	ENSSSCG00000024614	20/34	-	-	0.854955
13	SNP	197407347	A	[G]	0.0403727	intron_variant	ITSN1	ENSSSCG00000024614	20/34	-	-	0.854955
13	SNP	197407354	C	[T]	0.0403727	intron_variant	ITSN1	ENSSSCG00000024614	20/34	-	-	0.854955
13	SNP	197407535	T	[C]	0.0403727	intron_variant	ITSN1	ENSSSCG00000024614	20/34	-	-	0.854955
13	SNP	197407552	A	[G]	0.0403727	intron_variant	ITSN1	ENSSSCG00000024614	20/34	-	-	0.854955
13	SNP	197407759	T	[C]	0.0403727	intron_variant	ITSN1	ENSSSCG00000024614	20/34	-	-	0.854955
13	DELETION	197407848	N	DEL (272 bp)	0.0372671	intron_variant	ISTN1	ENSSSCG00000024614	20/24	-	-	0.783893
13	SNP	197408135	A	[C]	0.040625	intron_variant	ITSN1	ENSSSCG00000024614	20/34	-	-	0.854875
13	SNP	197408139	G	[A]	0.040625	intron_variant	ITSN1	ENSSSCG00000024614	20/34	-	-	0.854875
13	SNP	197408183	G	[A]	0.0403727	intron_variant	ITSN1	ENSSSCG00000024614	20/34	-	-	0.854955
13	SNP	197408226	A	[G]	0.0403727	intron_variant	ITSN1	ENSSSCG00000024614	20/34	-	-	0.854955
13	SNP	197408492	AC	[TG]	0.0403727	intron_variant	ITSN1	ENSSSCG00000024614	20/34	-	-	0.854955
13	SNP	197408577	T	[C]	0.0403727	intron_variant	ITSN1	ENSSSCG00000024614	20/34	-	-	0.854955
13	SNP	197417616	G	[A]	0.0403727	intron_variant	ITSN1	ENSSSCG00000024614	21/34	-	-	0.854955
13	SNP	197417634	G	[A]	0.0403727	intron_variant	ITSN1	ENSSSCG00000024614	21/34	-	-	0.854955
13	SNP	197417647	C	[G]	0.0403727	intron_variant	ITSN1	ENSSSCG00000024614	21/34	-	-	0.854955
13	SNP	197418089	A	[G]	0.0403727	intron_variant	ITSN1	ENSSSCG00000024614	21/34	-	-	0.854955
13	SNP	197418199	C	[T]	0.0403727	intron_variant	ITSN1	ENSSSCG00000024614	21/34	-	-	0.854955
13	SNP	197418236	A	[G]	0.0403727	intron_variant	ITSN1	ENSSSCG00000024614	21/34	-	-	0.854955
13	SNP	197418239	G	[A]	0.0403727	intron_variant	ITSN1	ENSSSCG00000024614	21/34	-	-	0.854955
13	SNP	197418261	G	[A]	0.0403727	intron_variant	ITSN1	ENSSSCG00000024614	21/34	-	-	0.854955
13	SNP	197418304	T	[C]	0.0403727	intron_variant	ITSN1	ENSSSCG00000024614	21/34	-	-	0.854955
13	SNP	197418306	G	[C]	0.0403727	intron_variant	ITSN1	ENSSSCG00000024614	21/34	-	-	0.854955
13	SNP	197418682	C	[T]	0.0403727	intron_variant	ITSN1	ENSSSCG00000024614	21/34	-	-	0.854955
13	SNP	197418700	G	[A]	0.0403727	intron_variant	ITSN1	ENSSSCG00000024614	21/34	-	-	0.854955
13	SNP	197418725	G	[A]	0.0403727	intron_variant	ITSN1	ENSSSCG00000024614	21/34	-	-	0.854955
13	SNP	197418751	T	[C]	0.0403727	intron_variant	ITSN1	ENSSSCG00000024614	21/34	-	-	0.854955
13	SNP	197418827	C	[T]	0.0403727	intron_variant	ITSN1	ENSSSCG00000024614	21/34	-	-	0.854955
13	SNP	197418907	G	[A]	0.0403727	intron_variant	ITSN1	ENSSSCG00000024614	21/34	-	-	0.854955
13	SNP	197418912	A	[G]	0.0403727	intron_variant	ITSN1	ENSSSCG00000024614	21/34	-	-	0.854955
13	SNP	197419177	A	[G]	0.0403727	intron_variant	ITSN1	ENSSSCG00000024614	21/34	-	-	0.854955
13	SNP	197419239	TG	[CA]	0.0403727	intron_variant	ITSN1	ENSSSCG00000024614	21/34	-	-	0.854955
13	SNP	197419313	G	[A]	0.0403727	splice_region_variant&synonymous_variant	ITSN1	ENSSSCG00000024614	-	T	-	0.854955
13	SNP	197419373	A	[G]	0.0403727	synonymous_variant	ITSN1	ENSSSCG00000024614	-	Q	-	0.854955
13	SNP	197419503	A	[G]	0.0403727	intron_variant	ITSN1	ENSSSCG00000024614	22/34	-	-	0.854955
13	INDEL	197419538	CTT	[CTTT]	0.0434783	intron_variant	ITSN1	ENSSSCG00000024614	22/34	-	-	0.801569
13	SNP	197419570	G	[A]	0.0434783	intron_variant	ITSN1	ENSSSCG00000024614	22/34	-	-	0.801569
13	SNP	197419573	C	[A]	0.0403727	intron_variant	ITSN1	ENSSSCG00000024614	22/34	-	-	0.854955
13	SNP	197419588	A	[G]	0.0403727	intron_variant	ITSN1	ENSSSCG00000024614	22/34	-	-	0.854955
13	SNP	197419695	G	[A]	0.0403727	intron_variant	ITSN1	ENSSSCG00000024614	22/34	-	-	0.854955
13	SNP	197419698	G	[A]	0.0403727	intron_variant	ITSN1	ENSSSCG00000024614	22/34	-	-	0.854955
13	SNP	197419785	A	[G]	0.0403727	intron_variant	ITSN1	ENSSSCG00000024614	22/34	-	-	0.854955
13	SNP	197420071	A	[G]	0.0403727	intron_variant	ITSN1	ENSSSCG00000024614	22/34	-	-	0.854955
13	SNP	197420152	T	[C]	0.0403727	intron_variant	ITSN1	ENSSSCG00000024614	22/34	-	-	0.854955
13	SNP	197420227	C	[T]	0.0403727	intron_variant	ITSN1	ENSSSCG00000024614	22/34	-	-	0.854955
13	SNP	197420285	G	[T]	0.0403727	intron_variant	ITSN1	ENSSSCG00000024614	22/34	-	-	0.854955
13	SNP	197420287	T	[C]	0.0403727	intron_variant	ITSN1	ENSSSCG00000024614	22/34	-	-	0.854955
13	SNP	197420289	G	[A]	0.0403727	intron_variant	ITSN1	ENSSSCG00000024614	22/34	-	-	0.854955
13	SNP	197420326	T	[C]	0.0434783	intron_variant	ITSN1	ENSSSCG00000024614	22/34	-	-	0.801569
13	SNP	197420610	C	[T]	0.0403727	intron_variant	ITSN1	ENSSSCG00000024614	22/34	-	-	0.854955
13	SNP	197420619	G	[A]	0.0403727	intron_variant	ITSN1	ENSSSCG00000024614	22/34	-	-	0.854955
13	SNP	197420672	C	[T]	0.0403727	intron_variant	ITSN1	ENSSSCG00000024614	22/34	-	-	0.854955
13	SNP	197420926	A	[G]	0.0403727	intron_variant	ITSN1	ENSSSCG00000024614	22/34	-	-	0.854955
13	SNP	197421290	A	[G]	0.0403727	intron_variant	ITSN1	ENSSSCG00000024614	22/34	-	-	0.854955
13	SNP	197421309	A	[T]	0.0403727	intron_variant	ITSN1	ENSSSCG00000024614	22/34	-	-	0.854955
13	SNP	197427385	C	[T]	0.0403727	intron_variant	ITSN1	ENSSSCG00000024614	24/34	-	-	0.854955
13	INDEL	197437687	CTA	[CTGTG]	0.046875	intron_variant	ITSN1	ENSSSCG00000024614	27/34	-	-	0.808054
13	SNP	197437708	T	[C]	0.046875	intron_variant	ITSN1	ENSSSCG00000024614	27/34	-	-	0.808054
13	SNP	197449228	A	[C]	0.0465838	intron_variant	ITSN1	ENSSSCG00000024614	29/34	-	-	0.858373
13	SNP	197449718	T	[C]	0.0403727	intron_variant	ITSN1	ENSSSCG00000024614	29/34	-	-	0.854955
13	SNP	197452135	T	[C]	0.0403727	intron_variant	ITSN1	ENSSSCG00000024614	29/34	-	-	0.854955
13	SNP	197452812	G	[A]	0.0403727	intron_variant	ITSN1	ENSSSCG00000024614	29/34	-	-	0.854955
13	SNP	197453069	A	[T]	0.0403727	intron_variant	ITSN1	ENSSSCG00000024614	29/34	-	-	0.854955
13	SNP	197460619	C	[T]	0.0465838	intron_variant	ITSN1	ENSSSCG00000024614	29/34	-	-	0.858373
13	SNP	197461750	G	[A]	0.0403727	intron_variant	ITSN1	ENSSSCG00000024614	29/34	-	-	0.854955
13	SNP	197466213	C	[T]	0.0403727	intron_variant	ITSN1	ENSSSCG00000024614	30/34	-	-	0.854955
13	SNP	197466355	T	[C]	0.0403727	intron_variant	ITSN1	ENSSSCG00000024614	30/34	-	-	0.854955
13	SNP	197466431	A	[G]	0.0403727	intron_variant	ITSN1	ENSSSCG00000024614	30/34	-	-	0.854955
13	SNP	197466544	G	[C]	0.0403727	intron_variant	ITSN1	ENSSSCG00000024614	30/34	-	-	0.854955
13	SNP	197466546	T	[C]	0.0403727	intron_variant	ITSN1	ENSSSCG00000024614	30/34	-	-	0.854955
13	SNP	197466742	G	[A]	0.0434783	intron_variant	ITSN1	ENSSSCG00000024614	30/34	-	-	0.801569
13	SNP	197466841	A	[G]	0.0403727	intron_variant	ITSN1	ENSSSCG00000024614	30/34	-	-	0.854955
13	SNP	197466871	A	[G]	0.0403727	intron_variant	ITSN1	ENSSSCG00000024614	30/34	-	-	0.854955
13	SNP	197467336	C	[T]	0.0403727	intron_variant	ITSN1	ENSSSCG00000024614	31/34	-	-	0.854955
13	SNP	197467338	T	[C]	0.0403727	intron_variant	ITSN1	ENSSSCG00000024614	31/34	-	-	0.854955
13	SNP	197467623	G	[A]	0.0403727	intron_variant	ITSN1	ENSSSCG00000024614	31/34	-	-	0.854955
13	SNP	197469433	G	[A]	0.0403727	intron_variant	ITSN1	ENSSSCG00000024614	31/34	-	-	0.854955
