# Supplementary material
Source: publisher figshare collection journal article supplement (https://plos.figshare.com/articles/dataset/_/7853096)
Supplement: Supplementary file 1 [file 1 › pgen.1008055.s030.xlsx]

## Sheet: LA3
Table S11: Genomic variation in high LD with the LA3 haplotype.
Chromosome	Type	Position	Ref	Alt	Allele frequency	Type	Gene symbol	Gene ID	Affected intron	Affected amino acid	SIFT score	LD (r2)
6	SNP	54641621	G	[A]	0.0186335	intron_variant	PRRG2	ENSSSCG00000003161	3/5	-	-	0.827991
6	SNP	54880241	T	[C]	0.0217391	missense_variant&splice_region_variant	PNKP	ENSSSCG00000003195	-	Q/R	deleterious(0.02)	0.793737
6	SNP	55703035	T	[C]	0.01875	downstream_gene_variant	-	ENSSSCG00000035586	-	-	-	0.827957
6	SNP	56102382	C	[T]	0.0186335	intergenic_variant	-	-	-	-	-	0.827991
