# Supplementary material
Source: publisher figshare collection journal article supplement (https://plos.figshare.com/articles/dataset/_/7853096)
Supplement: Supplementary file 1 [file 1 › pgen.1008055.s031.pdf]

**Table S12: RNA-seq expression in fragments per kilobase per million (FPKM) for wild-type and mutant transcript.** Table shows the FPKM expression values for both the wild-type (Wt) and mutant (exon-skipping) transcript.

| Hap. | Carrier identifiers | Gene          | Transcript IDs (Effect)                                                  | Wild-type | Mutant        |
|------|---------------------|---------------|--------------------------------------------------------------------------|-----------|---------------|
| LA1  | 711604              | <i>POLR1B</i> | TCONS_35434 (Wt), TCONS_35427 (exon skipping)                            | 627.35    | 126.24        |
| LA1  | 781828              | <i>POLR1B</i> | TCONS_35434 (Wt), TCONS_35427 (exon skipping)                            | 568.95    | 136.61        |
| LA1  | 924455              | <i>POLR1B</i> | TCONS_35434 (Wt), TCONS_35427 (exon skipping)                            | 483.44    | 99.21         |
| LA1  | 928519              | <i>POLR1B</i> | TCONS_35434 (Wt), TCONS_35427 (exon skipping)                            | 451.92    | 128.61        |
| DU1  | 768945              | <i>TADA2A</i> | TCONS_9105 (Wt), TCON_9101(intron retention), TCONS_9107 (exon skipping) | 495.56    | 39.33, 195.53 |
| DU1  | 780181              | <i>TADA2A</i> | TCONS_9105 (Wt), TCON_9101(intron retention), TCONS_9107 (exon skipping) | 517.72    | 61.84, 159.46 |
| DU1  | 906564              | <i>TADA2A</i> | TCONS_9105 (Wt), TCON_9101(intron retention), TCONS_9107 (exon skipping) | 310.01    | 83.59, 269.6  |
