# Supplementary material
Source: publisher figshare collection journal article supplement (https://plos.figshare.com/articles/dataset/_/7853096)
Supplement: Supplementary file 1 [file 1 › pgen.1008055.s032.pdf]

**Table S13: Validation of LA1 causal mutation in three carrier-by-carrier litters.** Sow (red) and Boar (blue) and complete liveborn (male and female) and stillborn progeny are genotyped for the T-43952776-G candidate causal mutation. No homozygous GG genotypes, and an excess of heterozygous GT genotypes are observed.

| Litter 1 / IDs | Genotype      | Sex              |  | Litter 2 / IDs | Genotype      | Sex              |  | Litter 3 / IDs | Genotype      | Sex              |
|----------------|---------------|------------------|--|----------------|---------------|------------------|--|----------------|---------------|------------------|
| L151           | GT            | Sow              |  | L707           | GT            | Sow              |  | L038           | GT            | Sow              |
| L207           | GT            | Boar             |  | L207           | GT            | Boar             |  | L006           | GT            | Boar             |
| P489           | TT            | Male             |  | P430           | GT            | Male             |  | P276           | TT            | Male             |
| P490           | GT            | Male             |  | P433           | GT            | Male             |  | P935           | GT            | Female           |
| P965           | GT            | Female           |  | P428           | GT            | Female           |  | P933           | GT            | Female           |
| P964           | GT            | Female           |  | P429           | GT            | Female           |  | P275           | TT            | Male             |
| P487           | TT            | Male             |  | P425           | GT            | Female           |  | P273           | GT            | Male             |
| P488           | GT            | Male             |  | P424           | GT            | Female           |  | P272           | TT            | Male             |
| P966           | GT            | Female           |  | P431           | GT            | Male             |  | P936           | GT            | Female           |
| P963           | GT            | Female           |  | P423           | TT            | Female           |  | P937           | TT            | Female           |
| P962           | GT            | Female           |  | P432           | TT            | Male             |  | P938           | GT            | Female           |
| P485           | TT            | Female           |  | P426           | GT            | Female           |  | P271           | TT            | Male             |
| P967           | TT            | Female           |  | P427           | TT            | Female           |  | P274           | TT            | Male             |
| P486           | GT            | Male             |  |                |               |                  |  | P934           | TT            | Female           |
| P491           | GT            | Male             |  |                |               |                  |  | P542           | GT            | Stillborn        |
| P553           | GT            | Stillborn        |  |                |               |                  |  |                |               |                  |
|                |               |                  |  |                |               |                  |  |                |               |                  |
| <b>Wt=TT</b>   | <b>Het=GT</b> | <b>Lethal=GG</b> |  | <b>Wt=TT</b>   | <b>Het=GT</b> | <b>Lethal=GG</b> |  | <b>Wt=TT</b>   | <b>Het=GT</b> | <b>Lethal=GG</b> |
| 4              | 10            | 0                |  | 3              | 8             | 0                |  | 7              | 6             | 0                |
