# Supplementary material
Source: publisher figshare collection journal article supplement (https://plos.figshare.com/articles/dataset/_/7853096)
Supplement: Supplementary file 1 [file 1 › pgen.1008055.s033.pdf]

**Table S14: Validation of LA2 causal mutation in one carrier-by-carrier litters.** Sow (red) and Boar (blue) and complete liveborn (male and female) and stillborn progeny are genotyped for the ACG-195977037-AG candidate causal frameshift deletion (1bp). No homozygous DEL/DEL genotypes, and an excess of heterozygous C/DEL genotypes are observed.

| Animal ID | Genotype  | Sex            |
|-----------|-----------|----------------|
| L035      | C/DEL     | Sow            |
| L192      | C/DEL     | Boar           |
| P944      | C/DEL     | Female         |
| P946      | CC        | Female         |
| P278      | CC        | Male           |
| P939      | C/DEL     | Female         |
| P942      | C/DEL     | Female         |
| P277      | C/DEL     | Male           |
| P279      | C/DEL     | Male           |
| P943      | C/DEL     | Female         |
| P940      | C/DEL     | Female         |
| P941      | CC        | Female         |
| P945      | C/DEL     | Female         |
| P540      | C/DEL     | Stillborn      |
| P544      | C/DEL     | Stillborn      |
|           |           |                |
| Wt=CC     | Het=C/DEL | Lethal=DEL/DEL |
| 3         | 10        | 0              |
