# Supplementary material
Source: publisher figshare collection journal article supplement (https://plos.figshare.com/articles/dataset/_/7853096)
Supplement: Supplementary file 1 [file 1 › pgen.1008055.s034.pdf]

**Table S15: Association analysis for LA1 carriers.** AA represents the number of non-carriers in the database, while AB represents the number of carrier animals. The carriers of the haplotype LA1, compared to non-carriers, show: Increased carcass quality [+ loin depth (LDE), - backfat (BFE), + meat percentage (MTP)], Lower meat quality [- IMF, + drip loss (DRY)], slower growth (Days required to gain 40 kg), Increased mothering ability (MAB) [- dead at 21 days, + weight at 21 days].

| Source | AA    | AB   | P value  | -log10(P value) | effect | se    | Trait                                                            |
|--------|-------|------|----------|-----------------|--------|-------|------------------------------------------------------------------|
| LA1    | 24479 | 3606 | 2.18E-41 | 41              | 0.356  | 0.026 | Days required from 80-120 kg.                                    |
| LA1    | 24475 | 3606 | 1.39E-34 | 34              | 0.306  | 0.025 | Lean meat percentage by CT                                       |
| LA1    | 24476 | 3606 | 3.53E-30 | 29              | 0.507  | 0.044 | Maternal effect 21 days litter weight from reproduction analysis |
| LA1    | 24475 | 3606 | 3.99E-27 | 26              | 0.569  | 0.053 | Days required from 40-120 kg                                     |
| LA1    | 24476 | 3606 | 2.97E-22 | 22              | 0.258  | 0.027 | Days required from 40-80 kg                                      |
| LA1    | 24476 | 3606 | 2.28E-20 | 20              | -0.013 | 0.001 | Intramuscular fat                                                |
| LA1    | 24476 | 3606 | 1.78E-11 | 11              | -0.031 | 0.005 | Maternal effect for dead at 21 days (litter)                     |
| LA1    | 24476 | 3606 | 1.96E-10 | 10              | 0.054  | 0.008 | Drip loss                                                        |
| LA1    | 24476 | 3606 | 4.34E-10 | 9               | -1.107 | 0.177 | Meat quality                                                     |
| LA1    | 24476 | 3606 | 8.23E-10 | 9               | 1.271  | 0.207 | Maternal ability                                                 |
| LA1    | 24476 | 3606 | 1.18E-09 | 9               | 1.035  | 0.170 | Carcass quality                                                  |
| LA1    | 24476 | 3606 | 2.49E-09 | 9               | -1.480 | 0.248 | Total number born                                                |
