# Supplementary material
Source: publisher figshare collection journal article supplement (https://plos.figshare.com/articles/dataset/_/7853096)
Supplement: Supplementary file 1 [file 1 › pgen.1008055.s035.pdf]

**Table S16: Association analysis for LA2, LA3, and DU1 carriers.** AA represents the number of non-carriers in the database, while AB represents the number of carrier animals. Results show no or very little evidence for heterozygote advantage for the LA2, LA3, and DU1 lethal haplotypes.

| Source | AA    | AB   | P value  | -log10 (Pvalue) | effect  | se       | Trait                  |
|--------|-------|------|----------|-----------------|---------|----------|------------------------|
| LA2    | 25726 | 2356 | 0.000187 | 4               | -0.042  | 0.011    | Number of teats        |
| LA2    | 25726 | 2356 | 0.001559 | 3               | 0.098   | 0.031    | Meat percentage        |
| LA2    | 25726 | 2356 | 0.002196 | 3               | -0.041  | 0.013    | Total number born      |
| LA3    | 26763 | 1319 | 5.00E-09 | 8               | -1.640  | 0.28     | Carcass quality        |
| LA3    | 26763 | 1319 | 8.01E-05 | 4               | 0.009   | 0.002    | Intramuscular fat      |
| LA3    | 26762 | 1319 | 0.000164 | 4               | -0.053  | 0.014    | Drip loss              |
| LA3    | 26766 | 1319 | 0.000164 | 4               | 0.249   | 0.066    | Meat quality           |
| DU1    | 9699  | 1077 | 0.000153 | 4               | 0.05289 | 0.01396  | Front Leg Pasterns     |
| DU1    | 9699  | 1077 | 0.00032  | 3               | -0.1291 | 0.03585  | Belly meat percentage  |
| DU1    | 9699  | 1077 | 0.000795 | 3               | -0.1412 | 0.04208  | Loin Depth             |
| DU1    | 9699  | 1077 | 0.001631 | 3               | 0.01282 | 0.004068 | Weaning weight 21 Days |
