# Supplementary material
Source: publisher figshare collection journal article supplement (https://plos.figshare.com/articles/dataset/_/7853096)
Supplement: Supplementary file 1 [file 1 › pgen.1008055.s036.pdf]

**Table S17: Litter information for purebred and crossbred litters in the Landrace population.** Table provides the number of records, the average, and standard deviation (stdev) within each of the two mating classes.

|                             | #Number of records | #Average | #Stdev |
|-----------------------------|--------------------|----------|--------|
| Landrace purebred matings   | 23,132             | 14.176   | 3.499  |
| Landrace crossbred litters* | 58,027             | 14.381   | 3.595  |

\* The landrace sow is mated with a Large White boar.
