# Supplementary material
Source: publisher figshare collection journal article supplement (https://plos.figshare.com/articles/dataset/_/7853096)
Supplement: Supplementary file 1 [file 1 › pgen.1008055.s037.xlsx]

## Sheet: LA4
Table S18: Genomic variation in LD with the LA4 haplotype. Only variants in low LD were found
Chromosome	Type	Position	Ref	Alt	Allele frequency	Type	Gene symbol	Gene ID	Affected intron	Affected amino acid	SIFT score	LD (r2)
12	SNP	23049491	C	[T]	0.0776398	intron_variant	CACNB1	ENSSSCG00000017510	7/13	-	-	0.314711
12	SNP	23056491	A	[T]	0.0776398	intron_variant	CACNB1	ENSSSCG00000017510	12/13	-	-	0.327863
12	SNP	23089799	C	[T]	0.0838509	intron_variant	PLXDC1	ENSSSCG00000017511	2/13	-	-	0.302439
12	SNP	23135552	C	[G]	0.0807453	intron_variant	PLXDC1	ENSSSCG00000017511	11/13	-	-	0.314711
12	SNP	23238652	T	[C]	0.0745342	intron_variant	LASP1	ENSSSCG00000040642	5/7	-	-	0.341992
12	INDEL	23239424	AAAGCCACGGGTCGGA	[AA]	0.0628931	intron_variant	LASP1	ENSSSCG00000040642	5/7	-	-	0.368
12	SNP	23242696	A	[T]	0.0776398	intron_variant	LASP1	ENSSSCG00000040642	4/7	-	-	0.327863
12	SNP	23242733	T	[C]	0.0745342	intron_variant	LASP1	ENSSSCG00000040642	4/7	-	-	0.341992
12	SNP	23242744	G	[A]	0.068323	intron_variant	LASP1	ENSSSCG00000040642	4/7	-	-	0.373657
12	SNP	23247508	C	[A]	0.068323	intron_variant	LASP1	ENSSSCG00000040642	4/7	-	-	0.348155
12	SNP	23247823	A	[C]	0.0745342	intron_variant	LASP1	ENSSSCG00000040642	4/7	-	-	0.313274
12	SNP	23247826	T	[C]	0.0745342	intron_variant	LASP1	ENSSSCG00000040642	4/7	-	-	0.313274
12	SNP	23247902	A	[G]	0.0745342	intron_variant	LASP1	ENSSSCG00000040642	4/7	-	-	0.313274
12	SNP	23346258	C	[G]	0.0714286	3_prime_UTR_variant	PSMB3	ENSSSCG00000037606	-	-	-	0.329922
