# Supplementary material
Source: publisher figshare collection journal article supplement (https://plos.figshare.com/articles/dataset/_/7853096)
Supplement: Supplementary file 1 [file 1 › pgen.1008055.s038.pdf]

**Table S19: WGS samples including breed and coverage information.**

| Sample | Population | Coverage |
|--------|------------|----------|
| D405   | Duroc      | 16.40    |
| L528   | Landrace   | 13.37    |
| D149   | Landrace   | 11.95    |
| D576   | Duroc      | 13.51    |
| D715   | Duroc      | 12.73    |
| L844   | Landrace   | 17.06    |
| L965   | Landrace   | 16.39    |
| D257   | Duroc      | 13.14    |
| L807   | Landrace   | 10.83    |
| D837   | Duroc      | 8.59     |
| D927   | Duroc      | 12.76    |
| L766   | Landrace   | 11.34    |
| D126   | Duroc      | 16.04    |
| L174   | Landrace   | 10.67    |
| L483   | Landrace   | 13.37    |
| D902   | Duroc      | 16.82    |
| D458   | Duroc      | 17.47    |
| D024   | Duroc      | 7.21     |
| D834   | Duroc      | 15.96    |
| L120   | Landrace   | 17.04    |
| L362   | Landrace   | 15.99    |
| D023   | Duroc      | 17.04    |
| D255   | Duroc      | 13.33    |
| D338   | Duroc      | 15.94    |
| D477   | Duroc      | 16.57    |
| D478   | Duroc      | 14.49    |
| D833   | Duroc      | 6.65     |
| D929   | Duroc      | 12.65    |
| L051   | Landrace   | 11.05    |
| L394   | Landrace   | 10.91    |
| L572   | Landrace   | 12.14    |
| L169   | Landrace   | 10.75    |
| L330   | Landrace   | 10.39    |
| L990   | Landrace   | 9.67     |
| D569   | Duroc      | 14.72    |
| L078   | Landrace   | 13.76    |
| D427   | Duroc      | 15.28    |
| L827   | Landrace   | 15.60    |
| D352   | Duroc      | 15.26    |
| L779   | Landrace   | 15.13    |
| L787   | Landrace   | 15.26    |
| D797   | Duroc      | 14.76    |
| L879   | Landrace   | 16.67    |
| D000   | Duroc      | 14.93    |
| L196   | Landrace   | 15.26    |
| L105   | Landrace   | 15.60    |
| D431   | Duroc      | 8.77     |
| D432   | Duroc      | 10.26    |
| D433   | Duroc      | 8.80     |
| D434   | Duroc      | 9.78     |
| D435   | Duroc      | 8.07     |
| D436   | Duroc      | 8.64     |
| D437   | Duroc      | 11.23    |
| D438   | Duroc      | 10.52    |
| D439   | Duroc      | 9.41     |
