# Supplementary material
Source: publisher figshare collection journal article supplement (https://plos.figshare.com/articles/dataset/_/7853096)
Supplement: Supplementary file 1 [file 1 › pgen.1008055.s039.pdf]

**Table S20: Heterozygous variants identified in the *POLR1B* and *TADA2A* RNA-seq expression data.** The presence of heterozygous variants supports the lack of genomic imprinting, and expression of both the maternal and paternal allele.

| Chromosome | Position | Ref/Alt | Gene          | VEP Annotation | Heterozygous sample | Reference observed | Alternate observed |
|------------|----------|---------|---------------|----------------|---------------------|--------------------|--------------------|
| 3          | 43949498 | G/T     | <i>POLR1B</i> | 3' UTR         | 711604              | 2                  | 1                  |
| 3          | 43952858 | C/T     | <i>POLR1B</i> | Missense       | 761156              | 9                  | 4                  |
| 12         | 38903760 | T/C     | <i>TADA2A</i> | Synonymous     | 787897              | 3                  | 2                  |
