# Supplementary material
Source: publisher figshare collection journal article supplement (https://plos.figshare.com/articles/dataset/_/7853096)
Supplement: Supplementary file 1 [file 1 › pgen.1008055.s040.xlsx]

## Sheet: TableS21
Table S21: Haplotypes detected using a strict Hardy-Weinberg exact test threshold for individual marker filtering (P < 1x10-30). No new haplotypes were revealed. Slight differences are likely caused by haplotype phasing.
Hap.	SSC	Start	End	#Carriers	Carrier. Freq	Expected (trio)	Expected (freq.)	Observed	Exact binomial test	# Genotyped progeny	# Heterozygote progeny
DU1	12	38.5	39	1084	9.6	7 .0	26.1	0	1.81e-13	28	18 (64.3%)
LA1	3	42.6	47.5	3763	13.4	52	126	0	2.11e-63	208	120 (57.7%)
LA2	13	195.7	196.2	2359	8.4	18.5	49.5	2	6.39e-22	74	53 (72.6%)
LA3	6	52.5	54	1319	4.7	6	15.5	0	2.54e-08	24	11 (45.8%)
LA4	12	25	27	1271	4.6	-	14.4	3	0.00017	5	3 (60%)
